# Supplementary material for: A Three-step Process to Isolate Large Quantities of Bioactive Sesquiterpene Lactones from <em>Cichorium intybus</em> L. Roots and Semi-synthesis of Chicory STLs Standards
Source: Preprints.org preprint supplement (doi:10.20944/preprints202303.0538.v1), 2023-03-30

**Supplementary Information**

A Three-step Process to Isolate Large Quantities of Bioactive Sesquiterpene Lactones from *Cichorium intybus* L. Roots and Semi-synthesis of Chicory STLs Standards

**Francesca Ruggieri (1),†, Philippe Hance (2),(3),†,*, Bruna Gioia (1), Alexandre Biela (1), Pascal Roussel (4), Jean-Louis Hilbert (2), Nicolas Willand (1)**

(1) University of Lille, Inserm, Institut Pasteur de Lille, U1177—Drugs and Molecules for Living Systems, F-59000 Lille, France

(2) BioEcoAgro N° 1158, Univ. Lille, INRAE, Univ. Liège, UPJV, YNCREA, Univ. Artois, Univ. Littoral Côte d’Opale, ICV – Institut Charles Viollette, F-59000 Lille, France

(3) Joint Laboratory University of Lille – Florimond-Desprez CHIC41Health, France

(4) Unité de Catalyse et de Chimie du Solide (UCCS), Université de Lille, CNRS, Centrale Lille, Université d’Artois, UMR 8181—UCCS, F-59000 Lille, France

Correspondence: philippe.hance@univ-lille.fr

† These authors contributed equally to this work.

**1H and 13C NMR Spectra:**

**11β,13-dihydrolactucin (DHLc)**,1H NMR (300 MHz, DMSO)

**
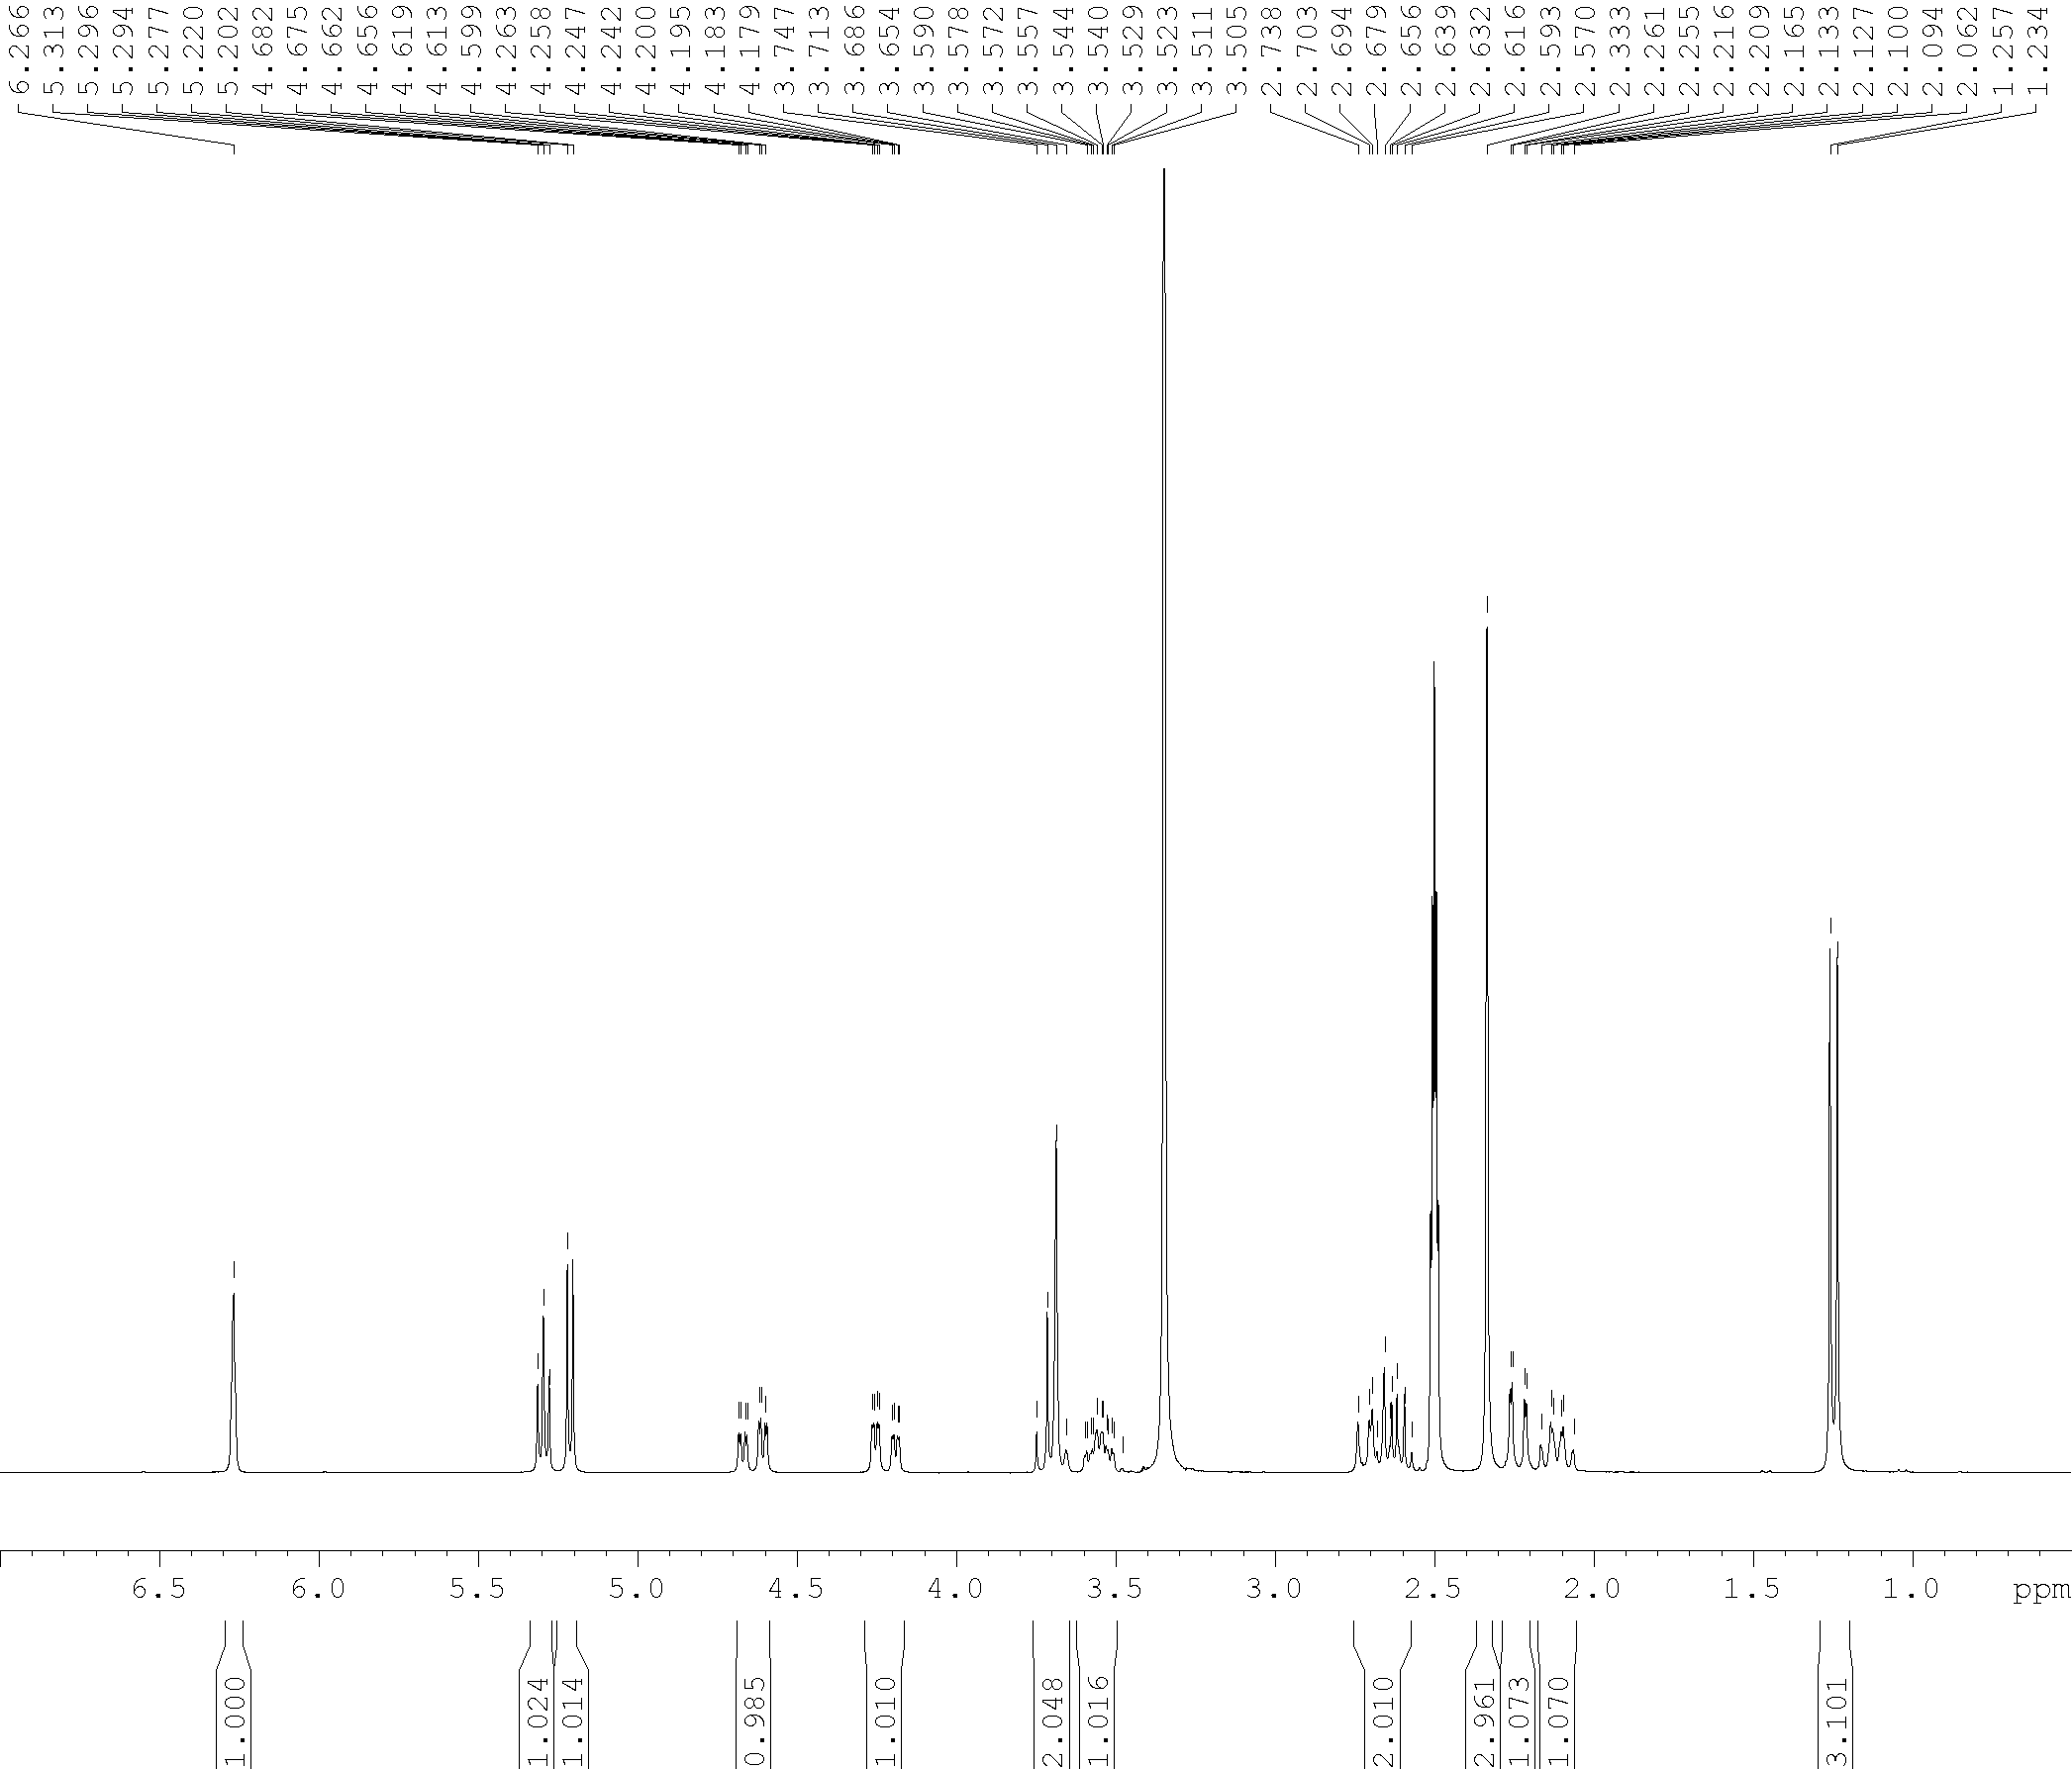
**

**
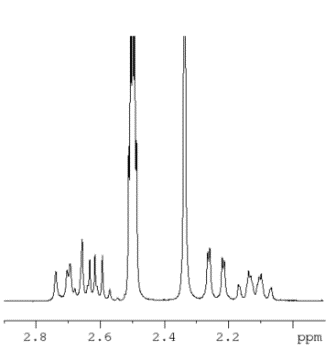
**

**11β,13-dihydrolactucin (DHLc)**, 13C NMR (75 MHz, DMSO)

**
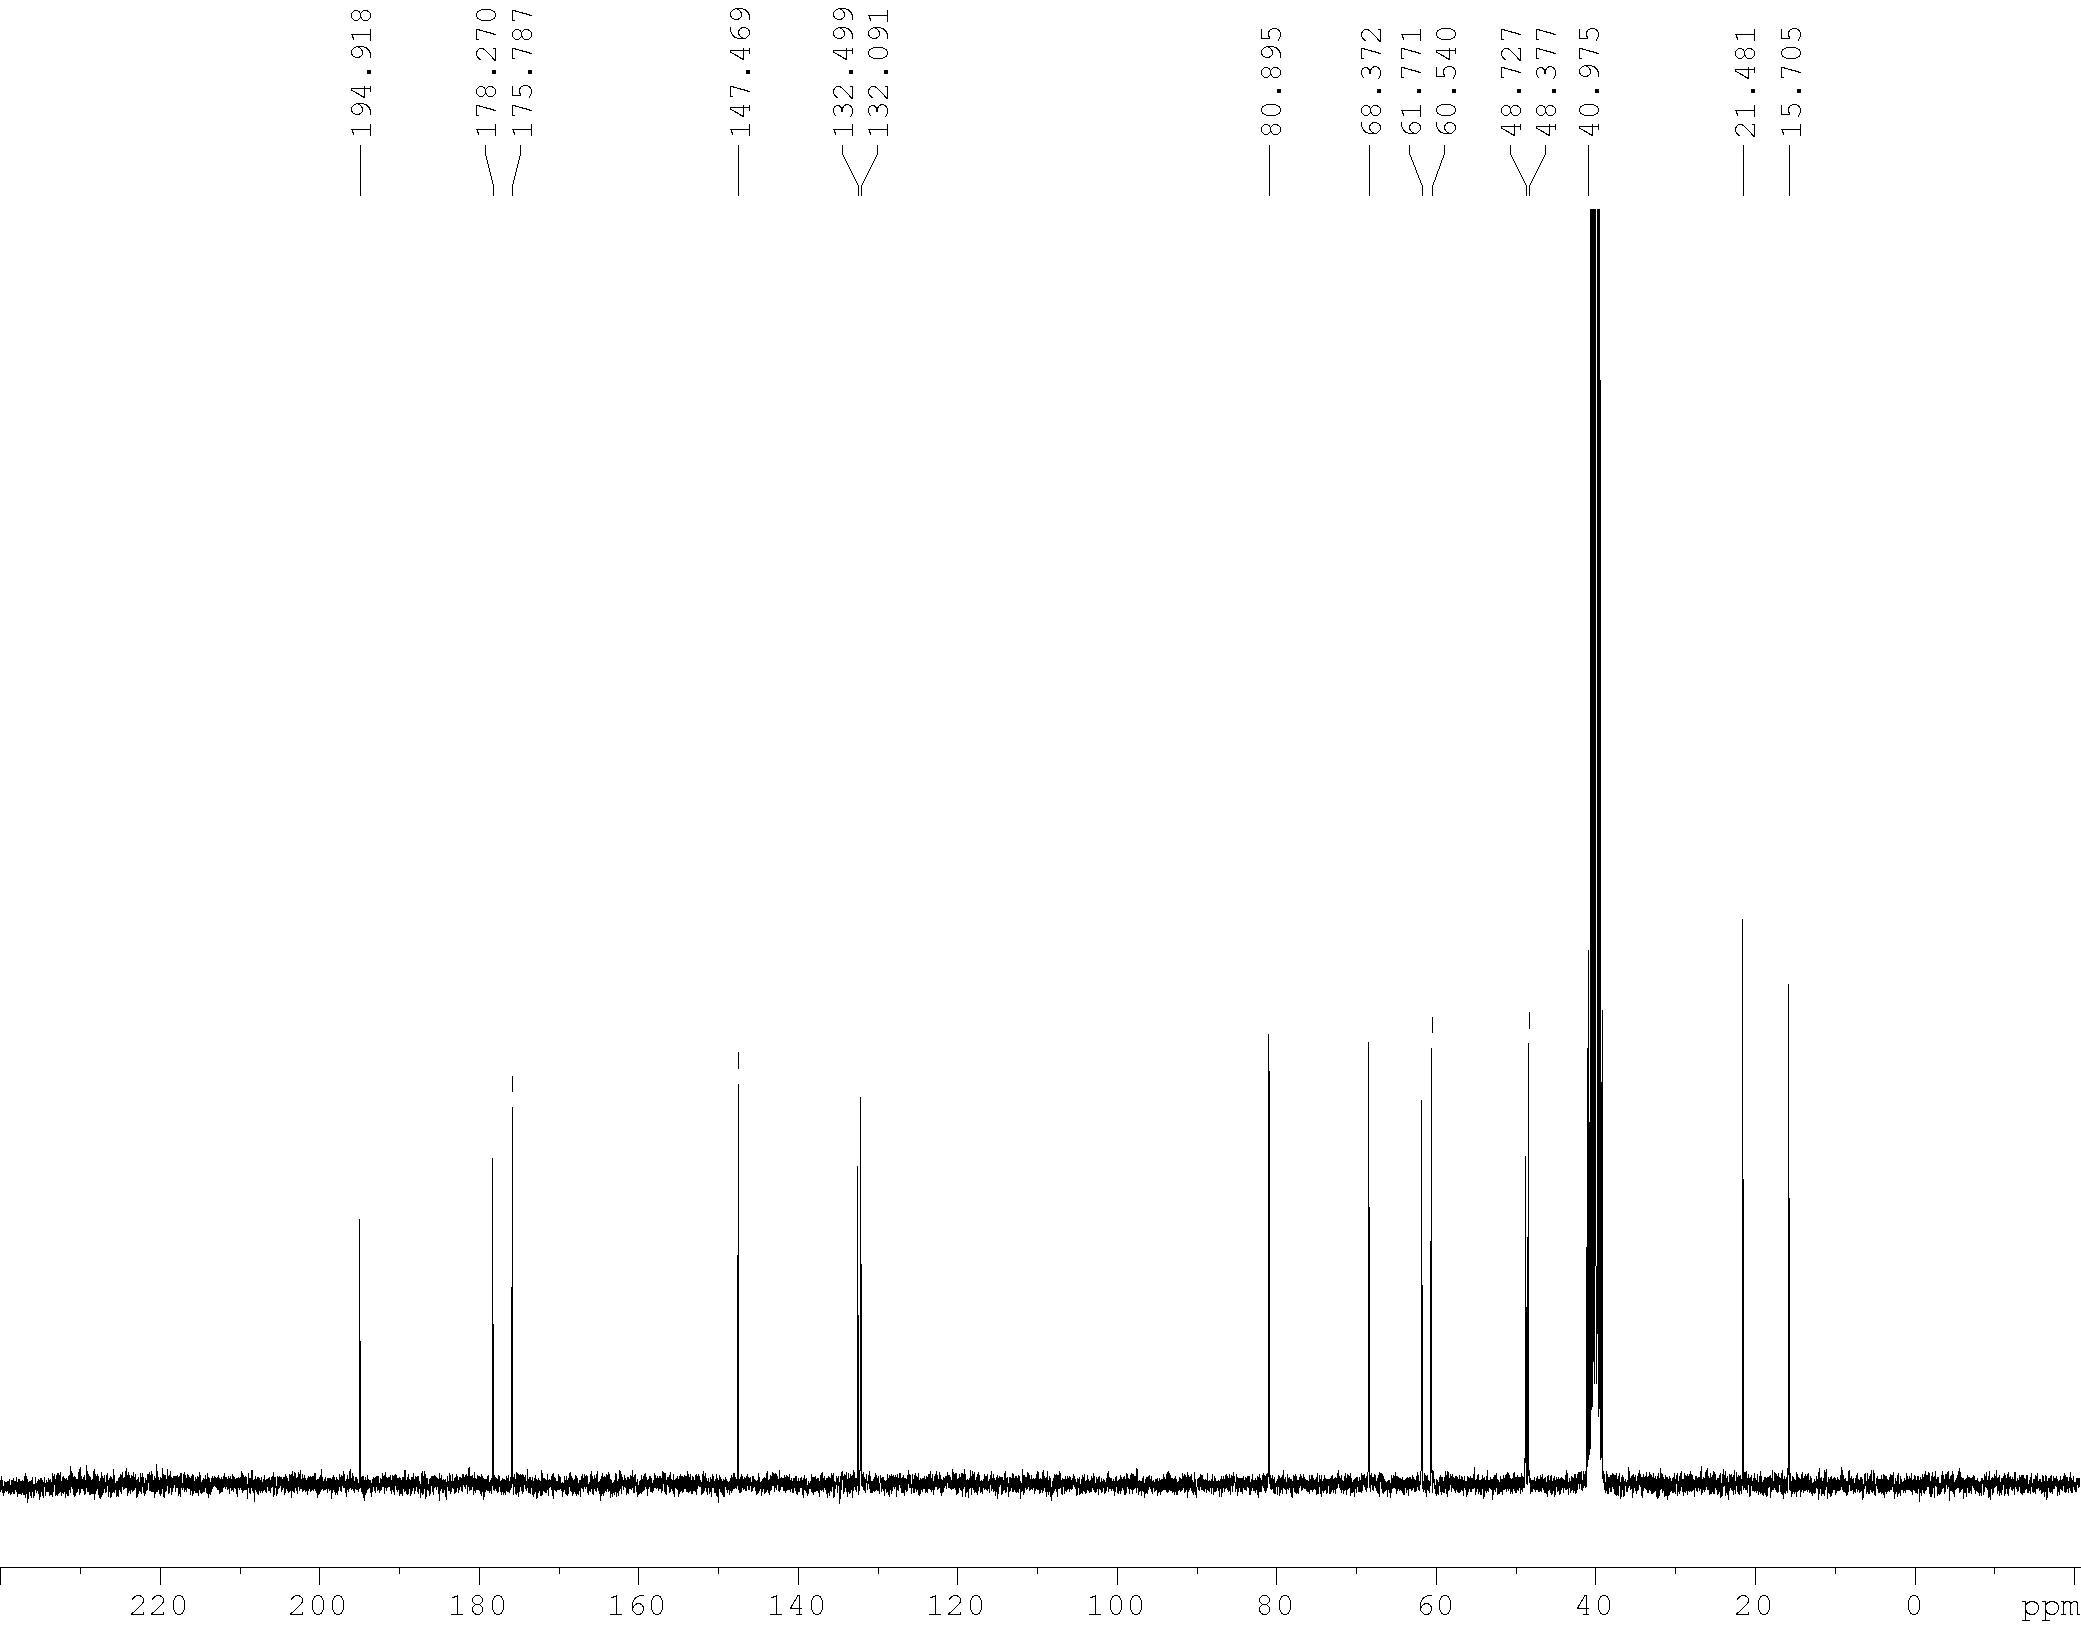
**

**
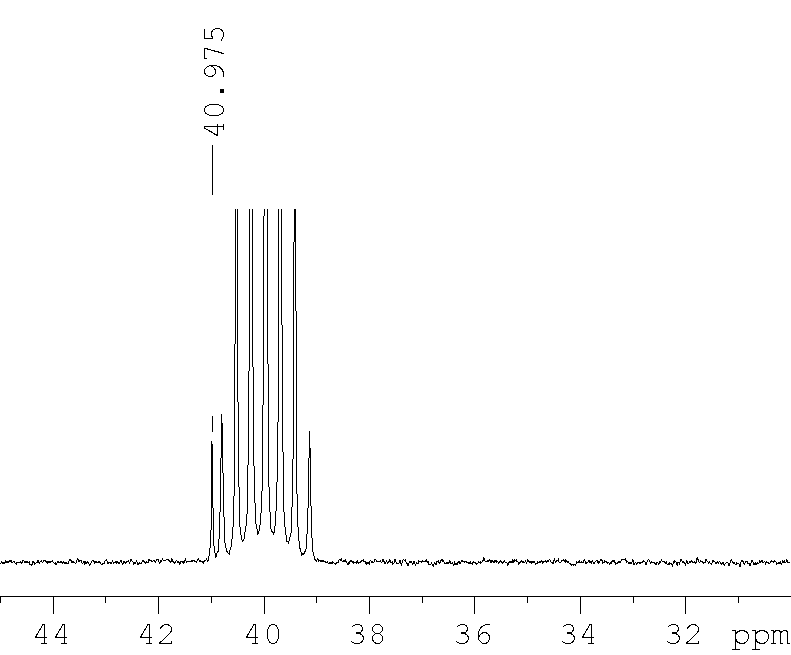
**

**Lactucin (Lc)**,1H NMR (300 MHz, DMSO)

**
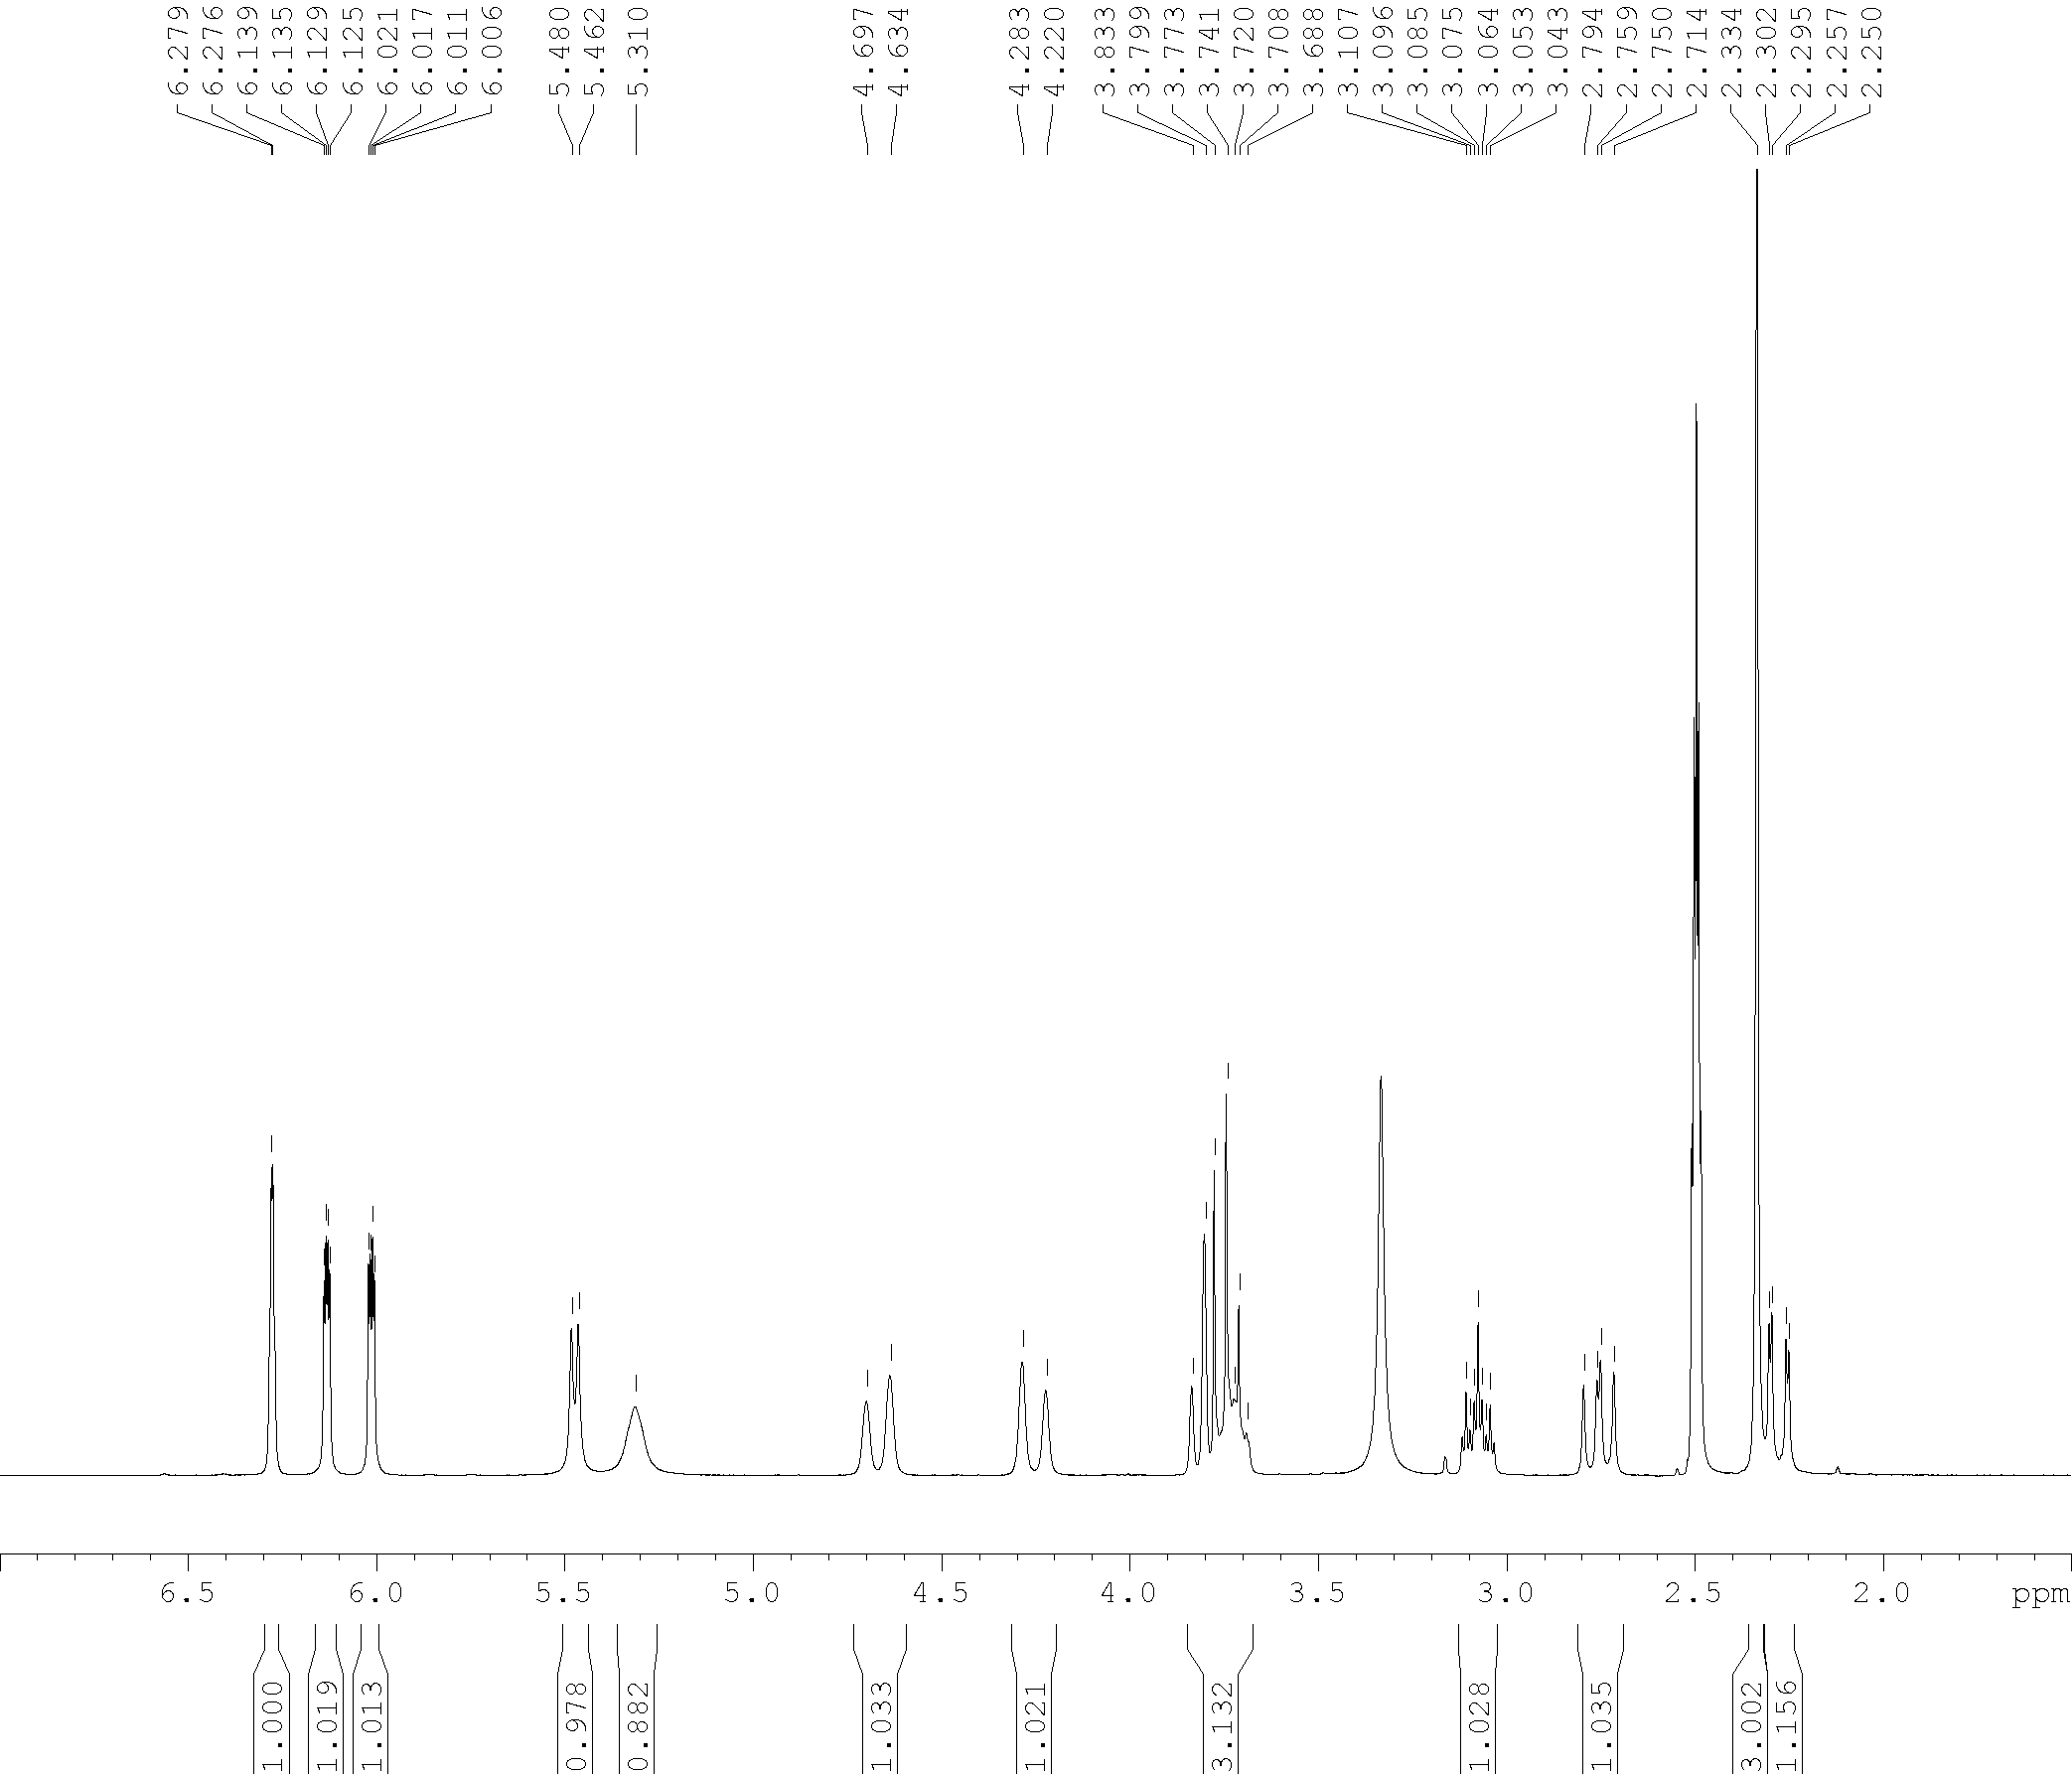
**

**
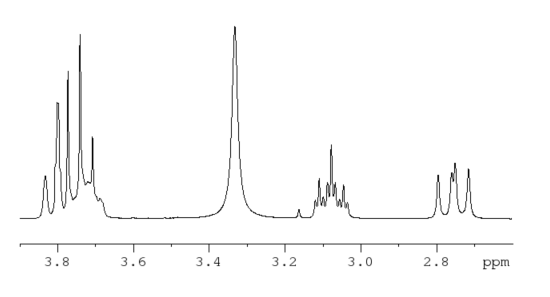
**

**Lactucin (DHLc)**,13C NMR (75 MHz, DMSO)

**
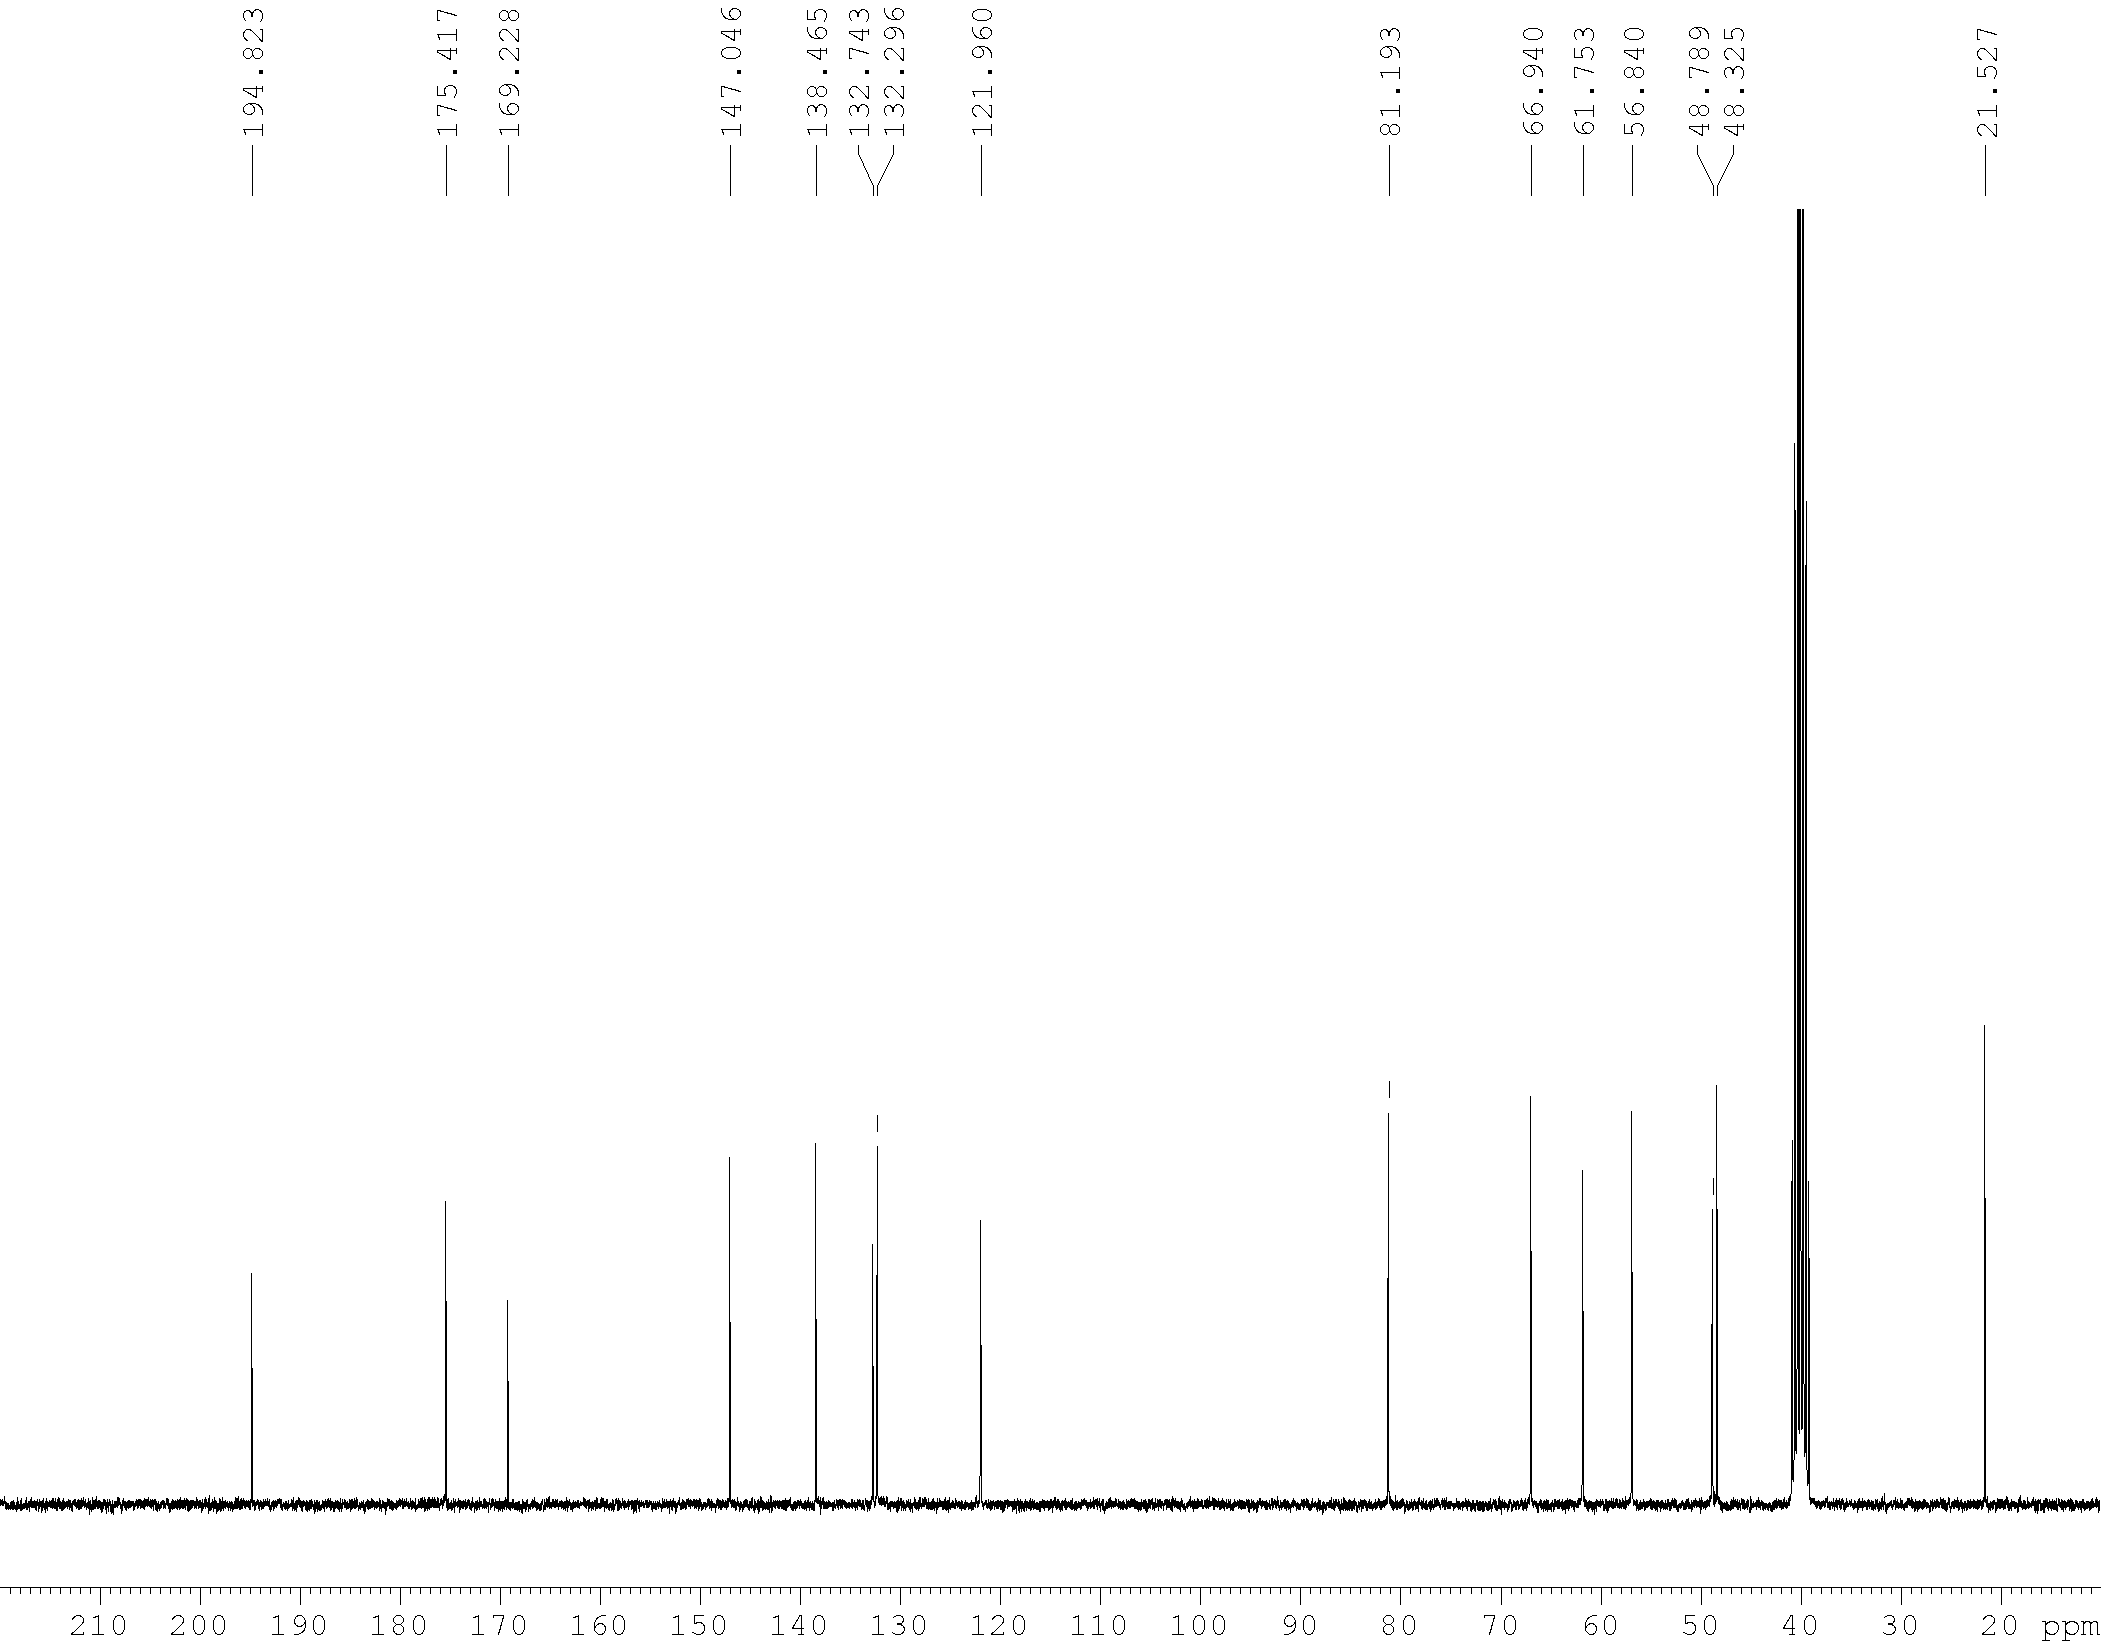
**

**DHLc-Me-oxalate**, 1H NMR (300 MHz, DMSO)

**
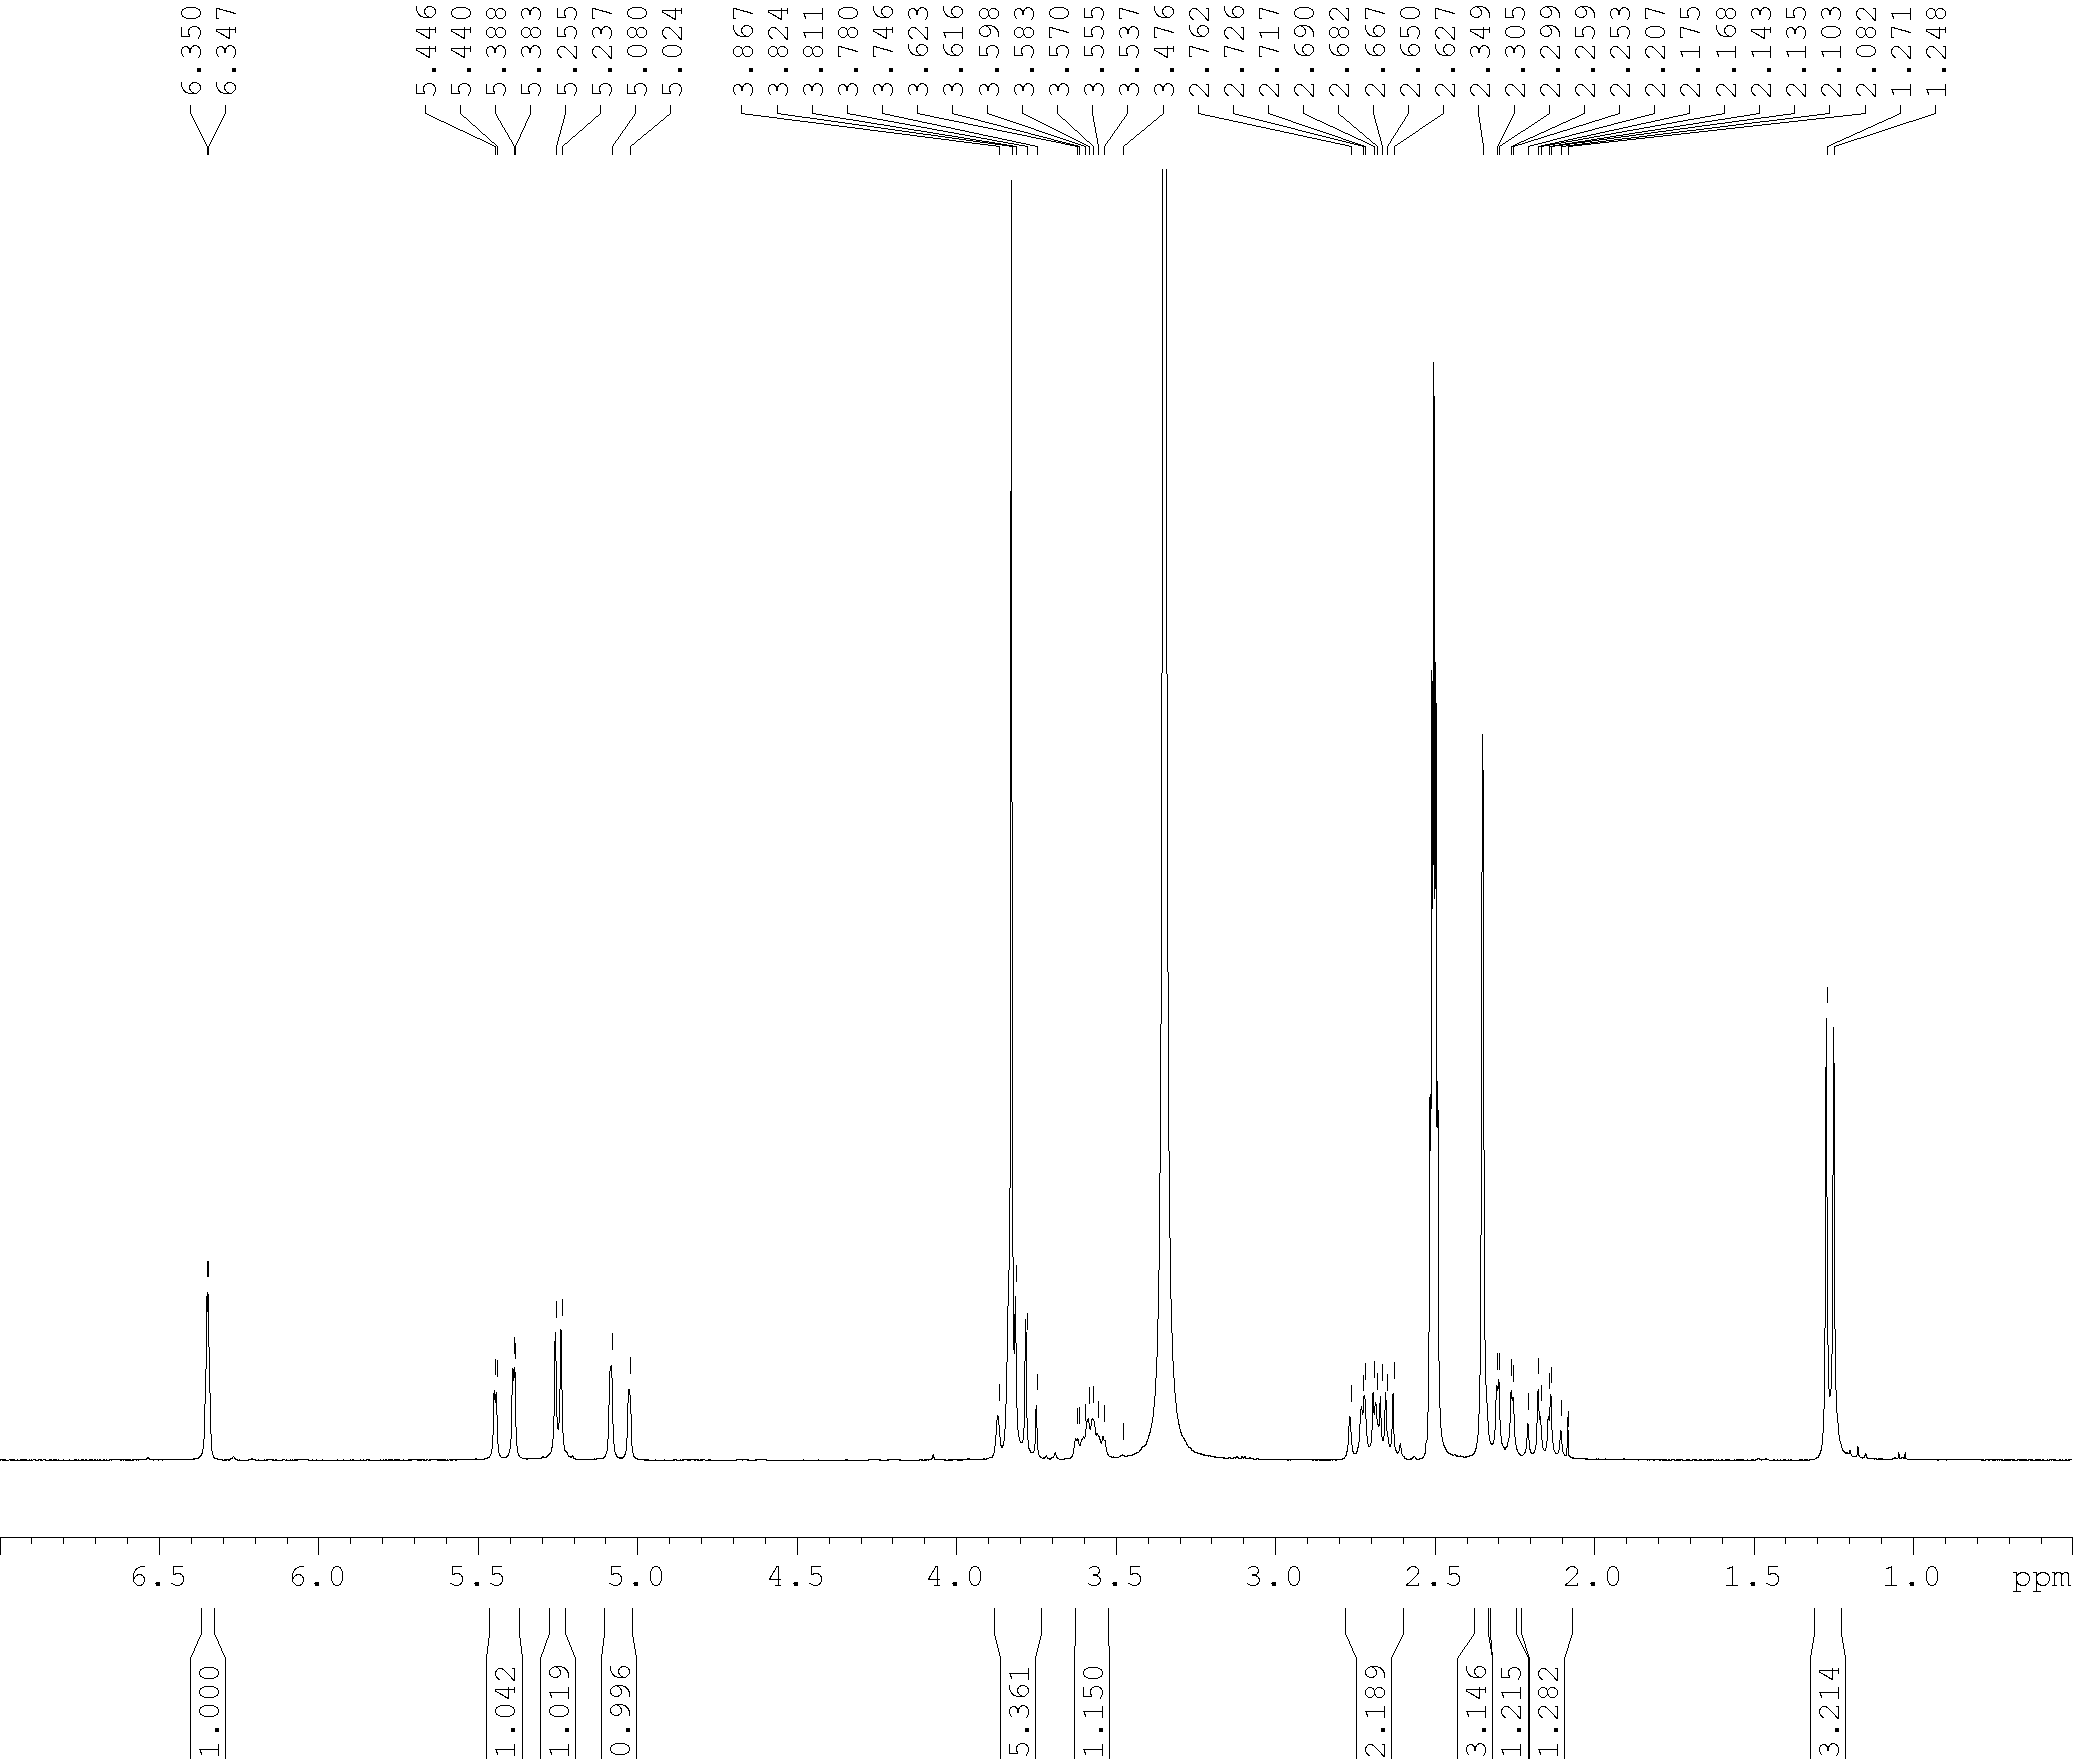
**

**
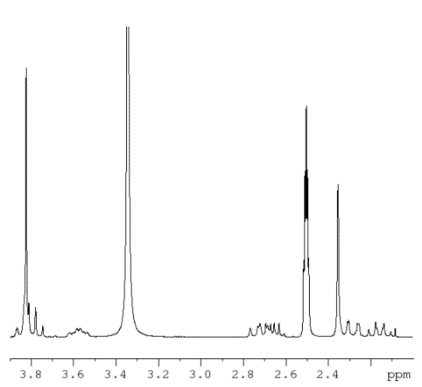
**

**DHLc-Me-oxalate**,13C NMR (75 MHz, DMSO)

**
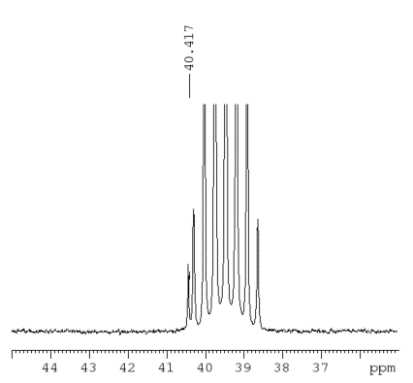

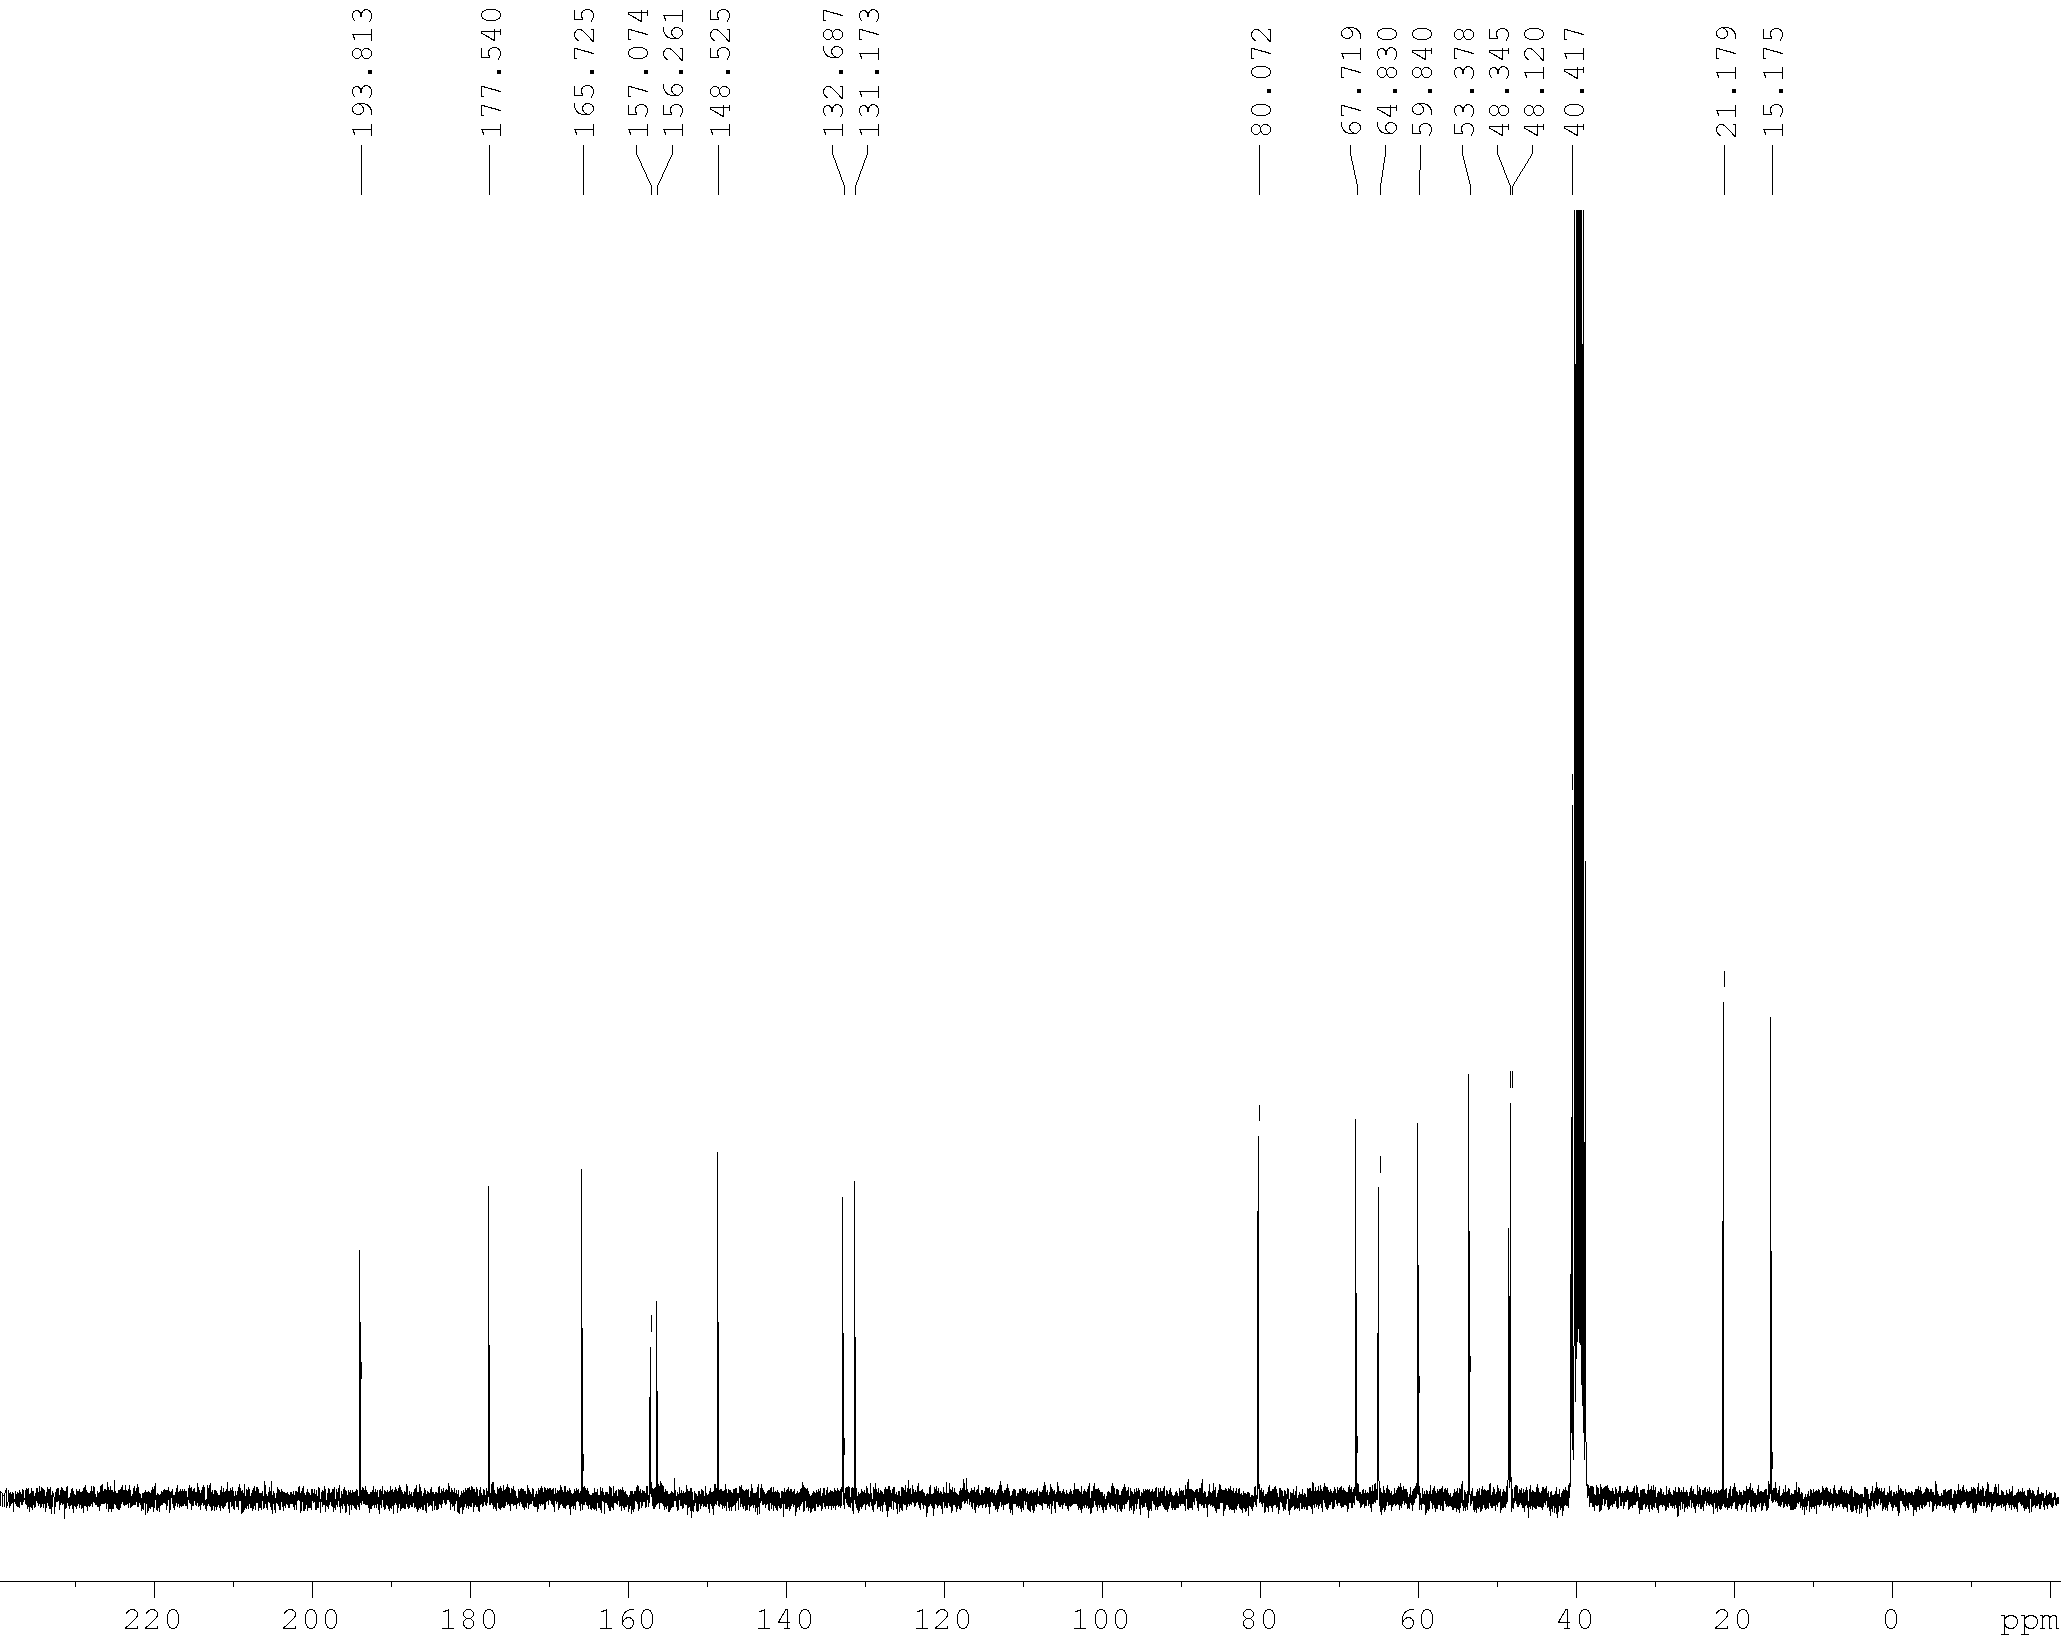
**

**
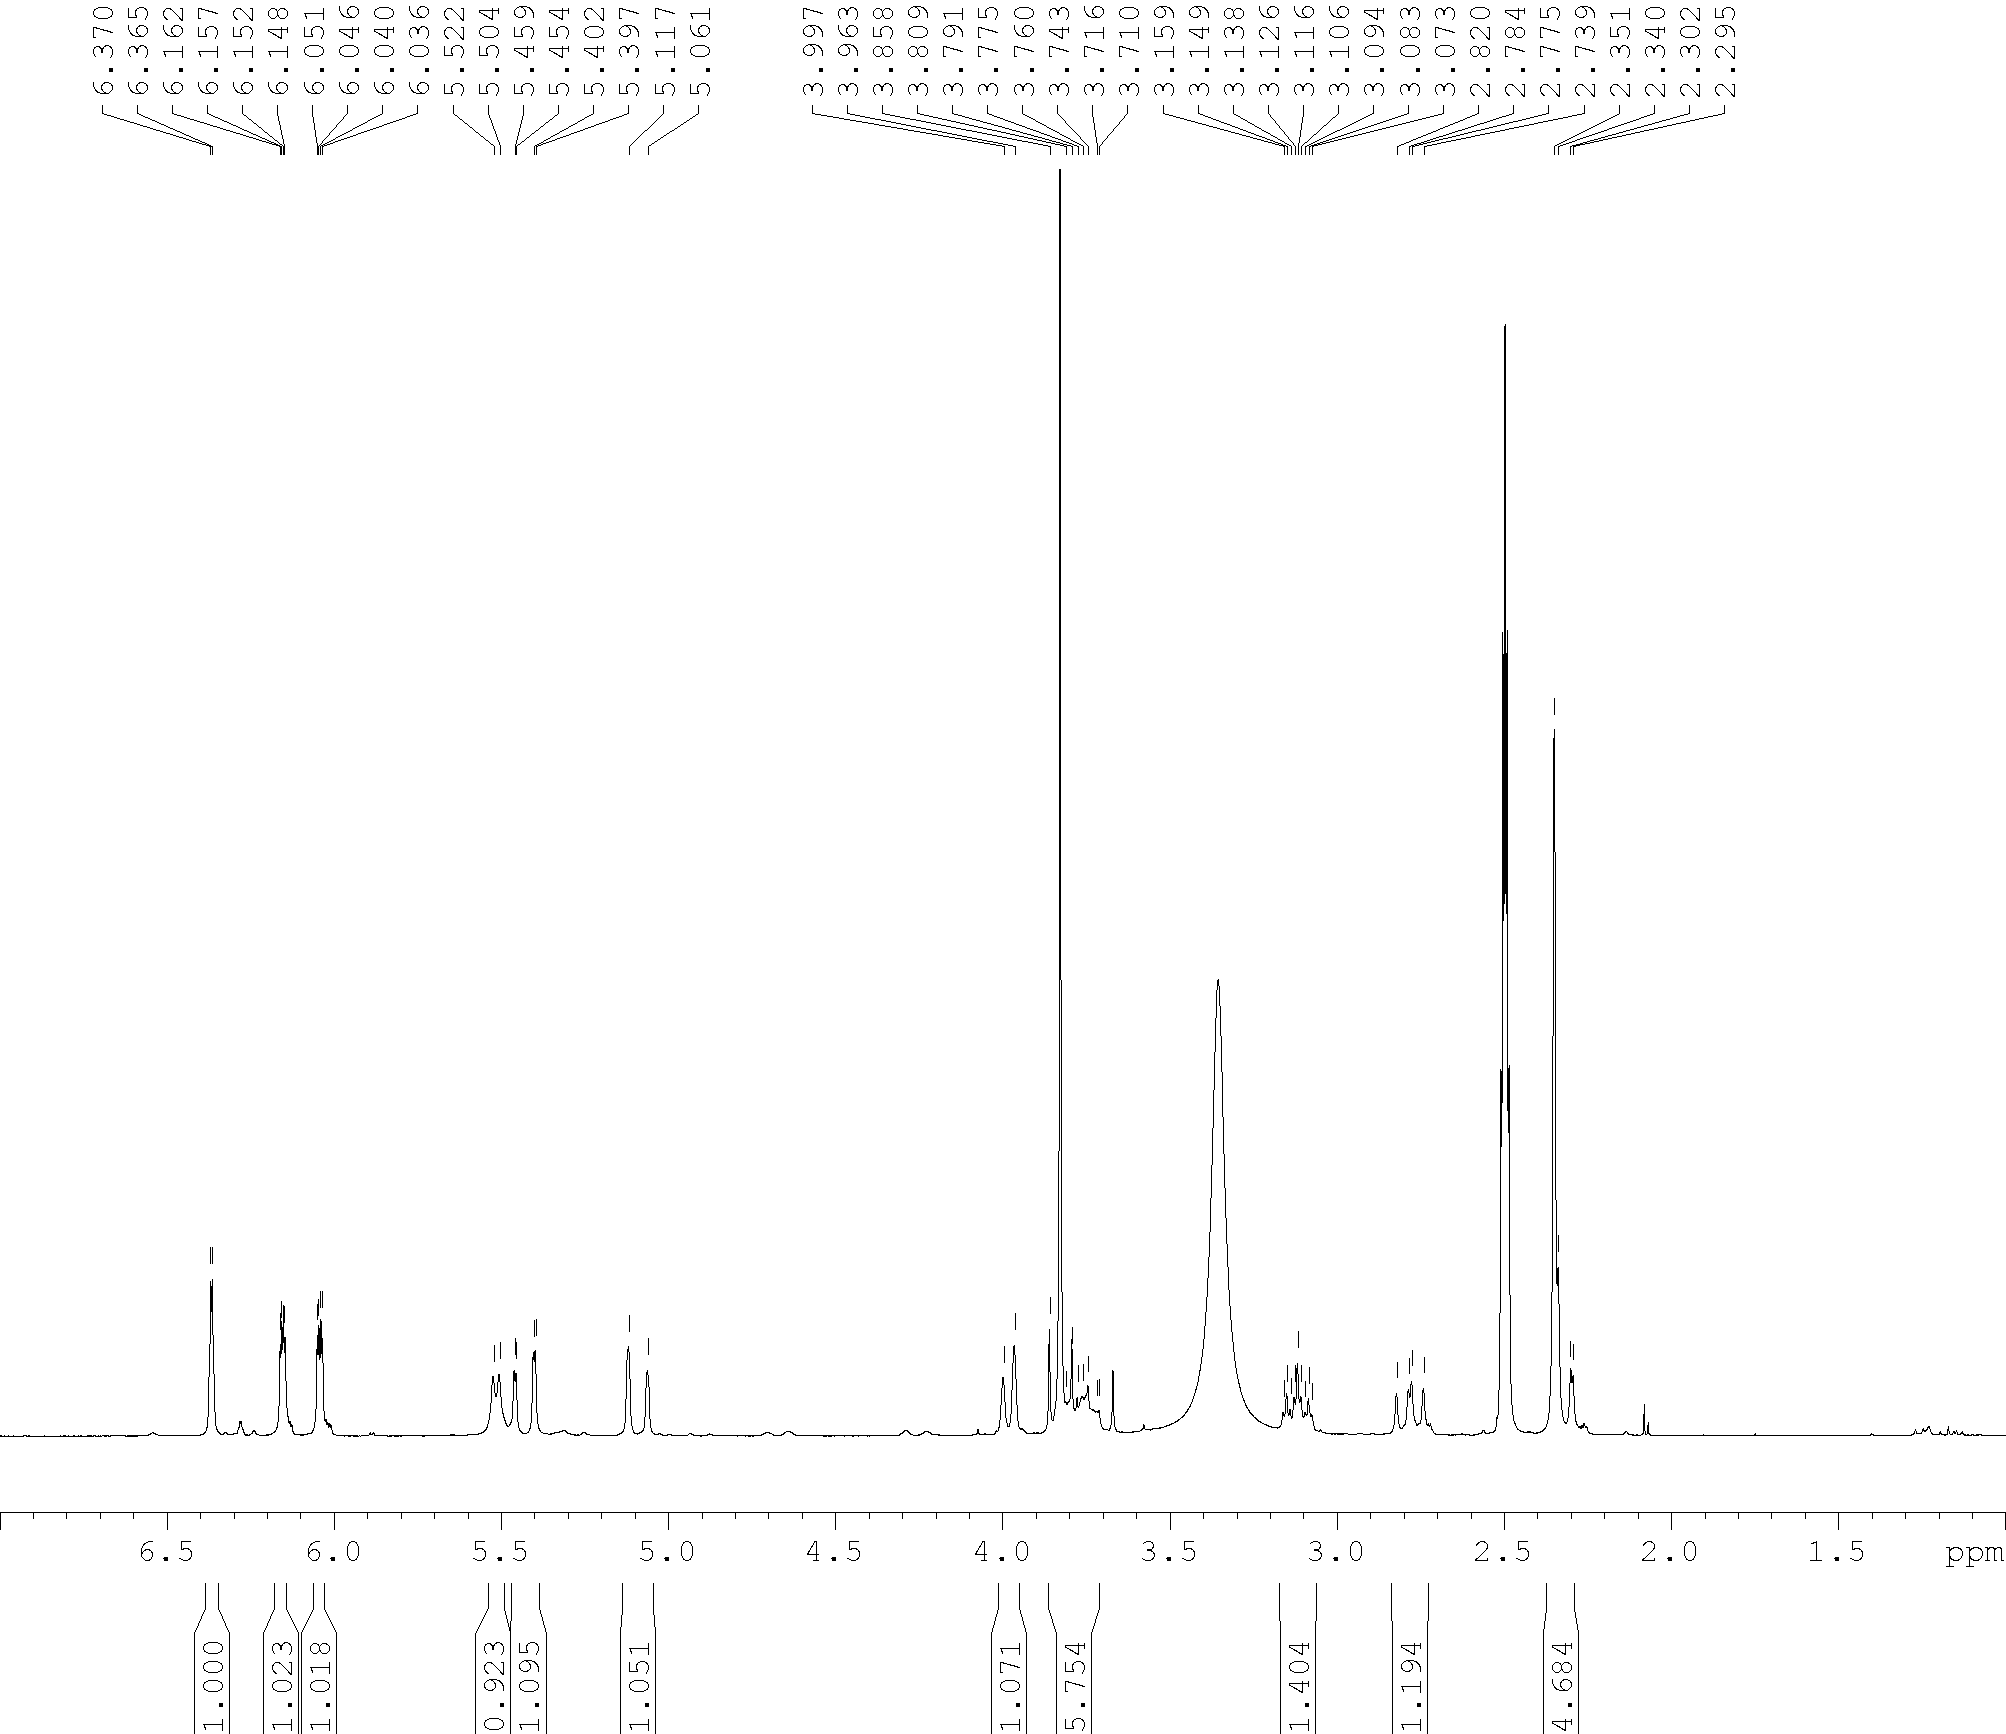
Lc-Me-oxalate**,1H NMR (300 MHz, DMSO)

**
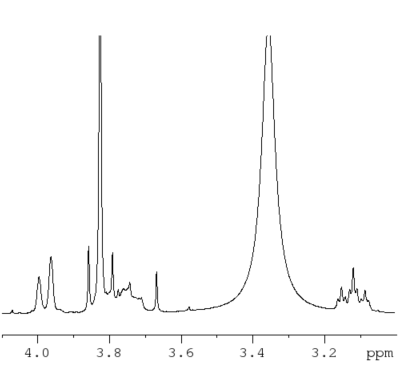
**

**Lc-Me-oxalate**,13C NMR (75 MHz, DMSO)

**
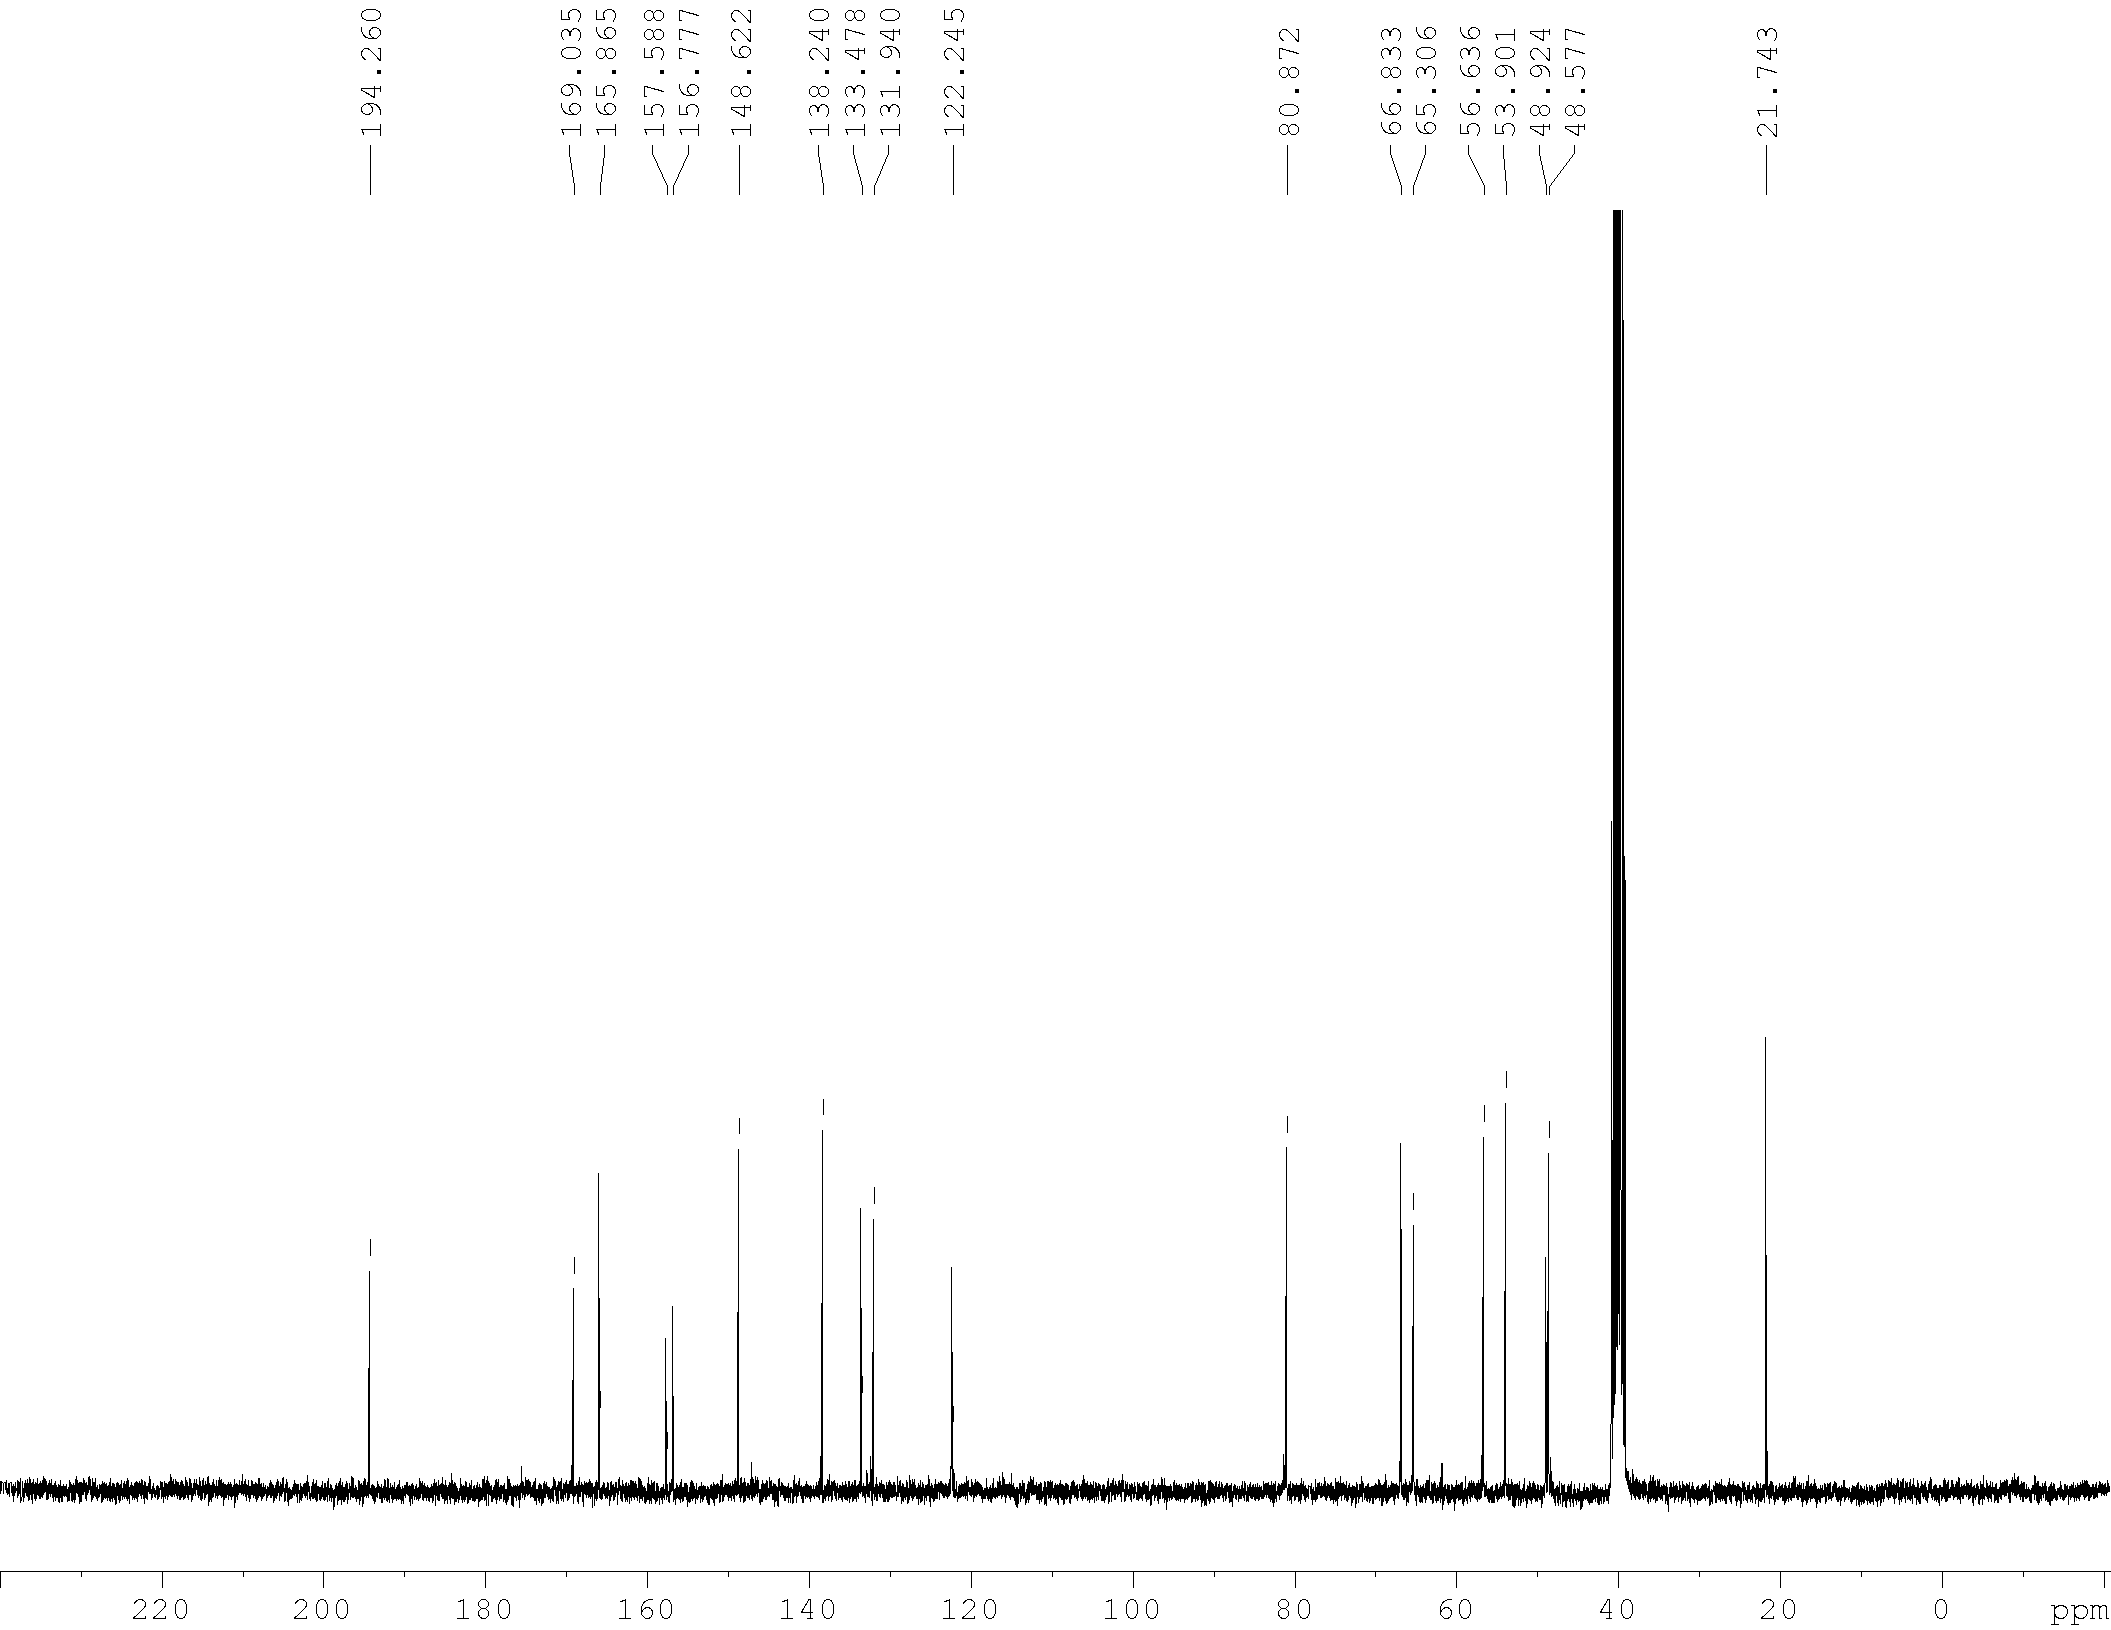
**

**DHLc-oxalate**,1H NMR (300 MHz, DMSO)


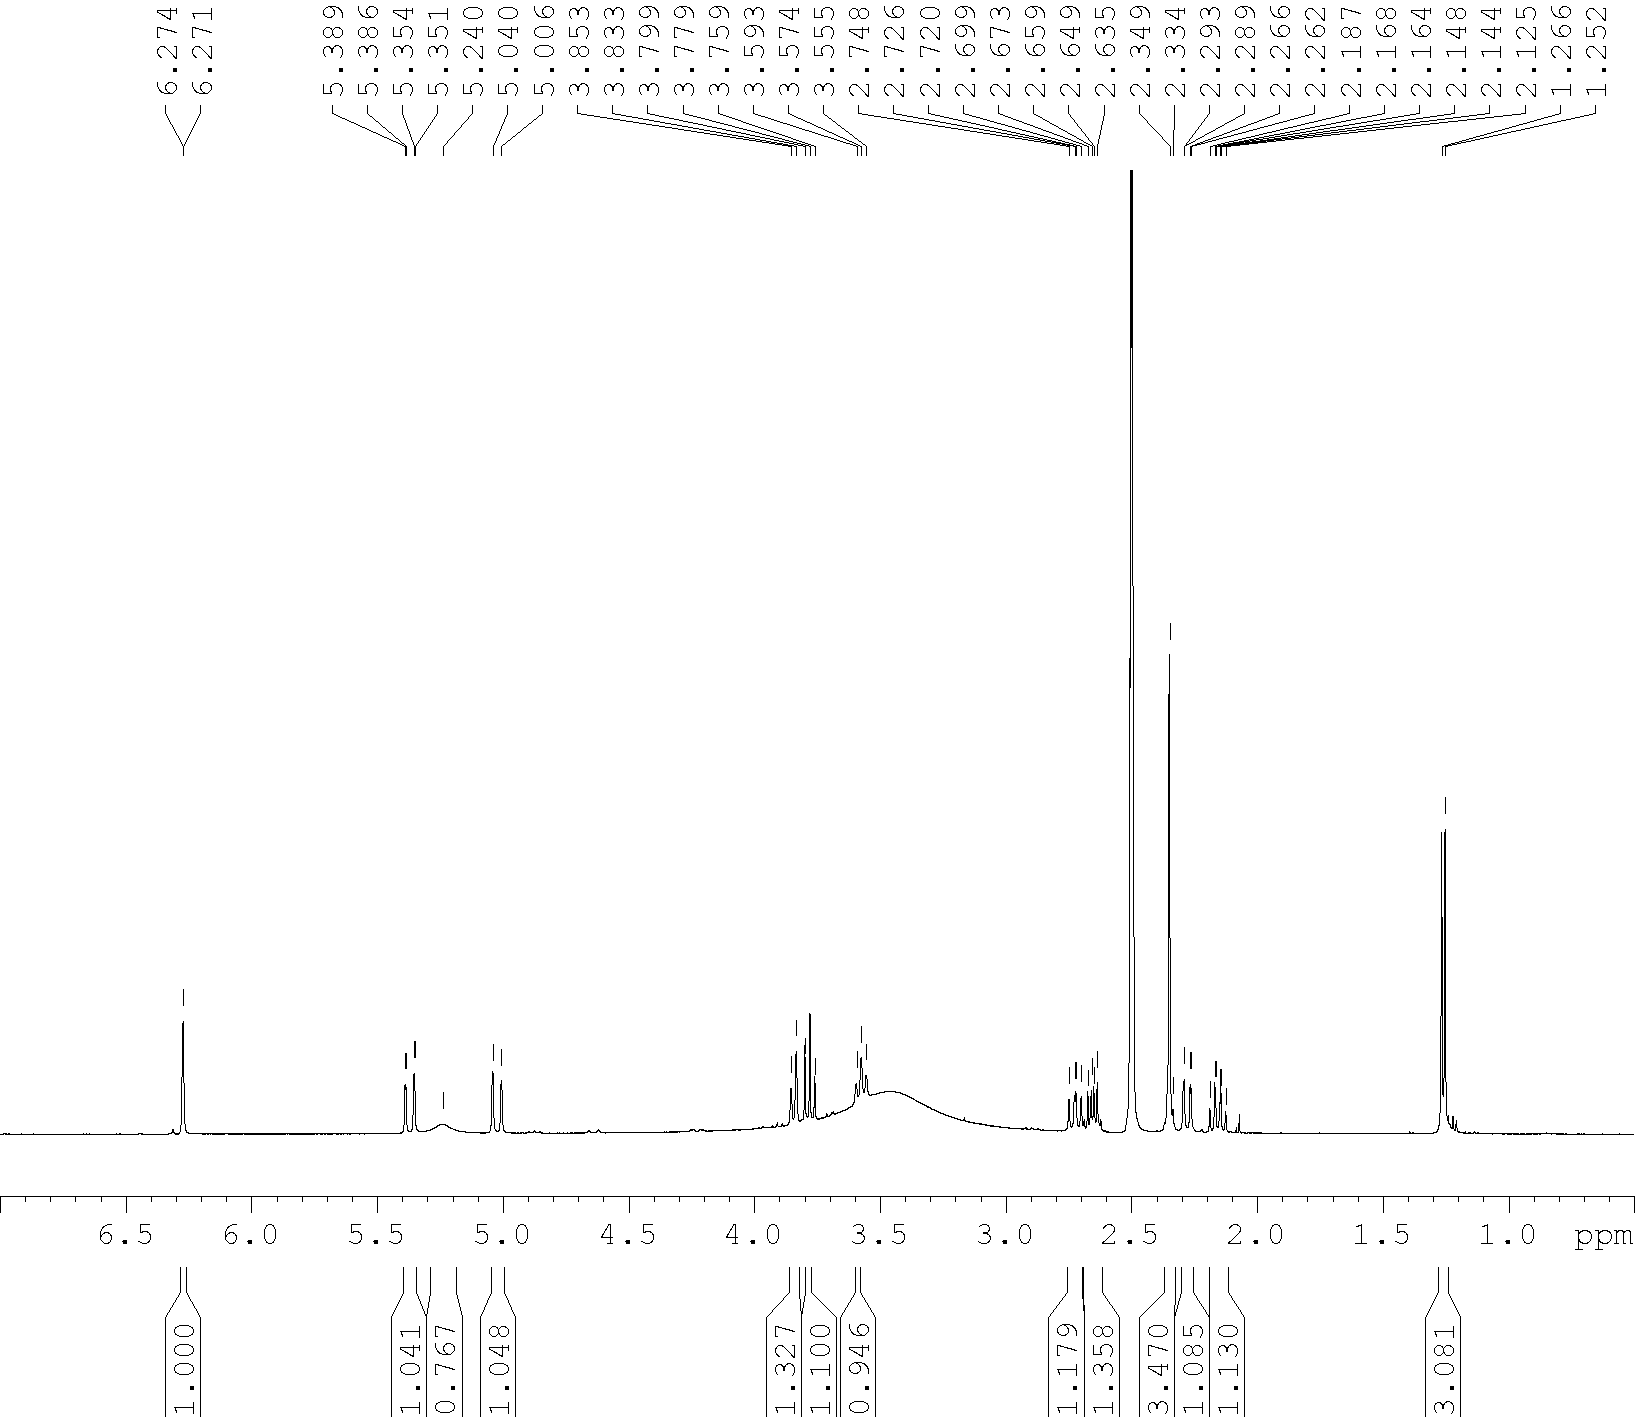


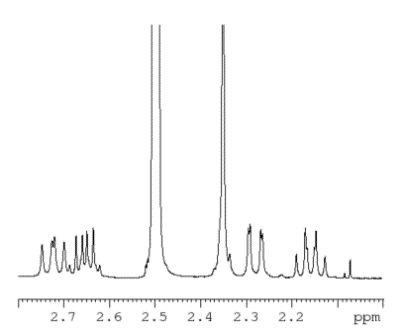


**DHLc-oxalate**,13C NMR (75 MHz, DMSO)


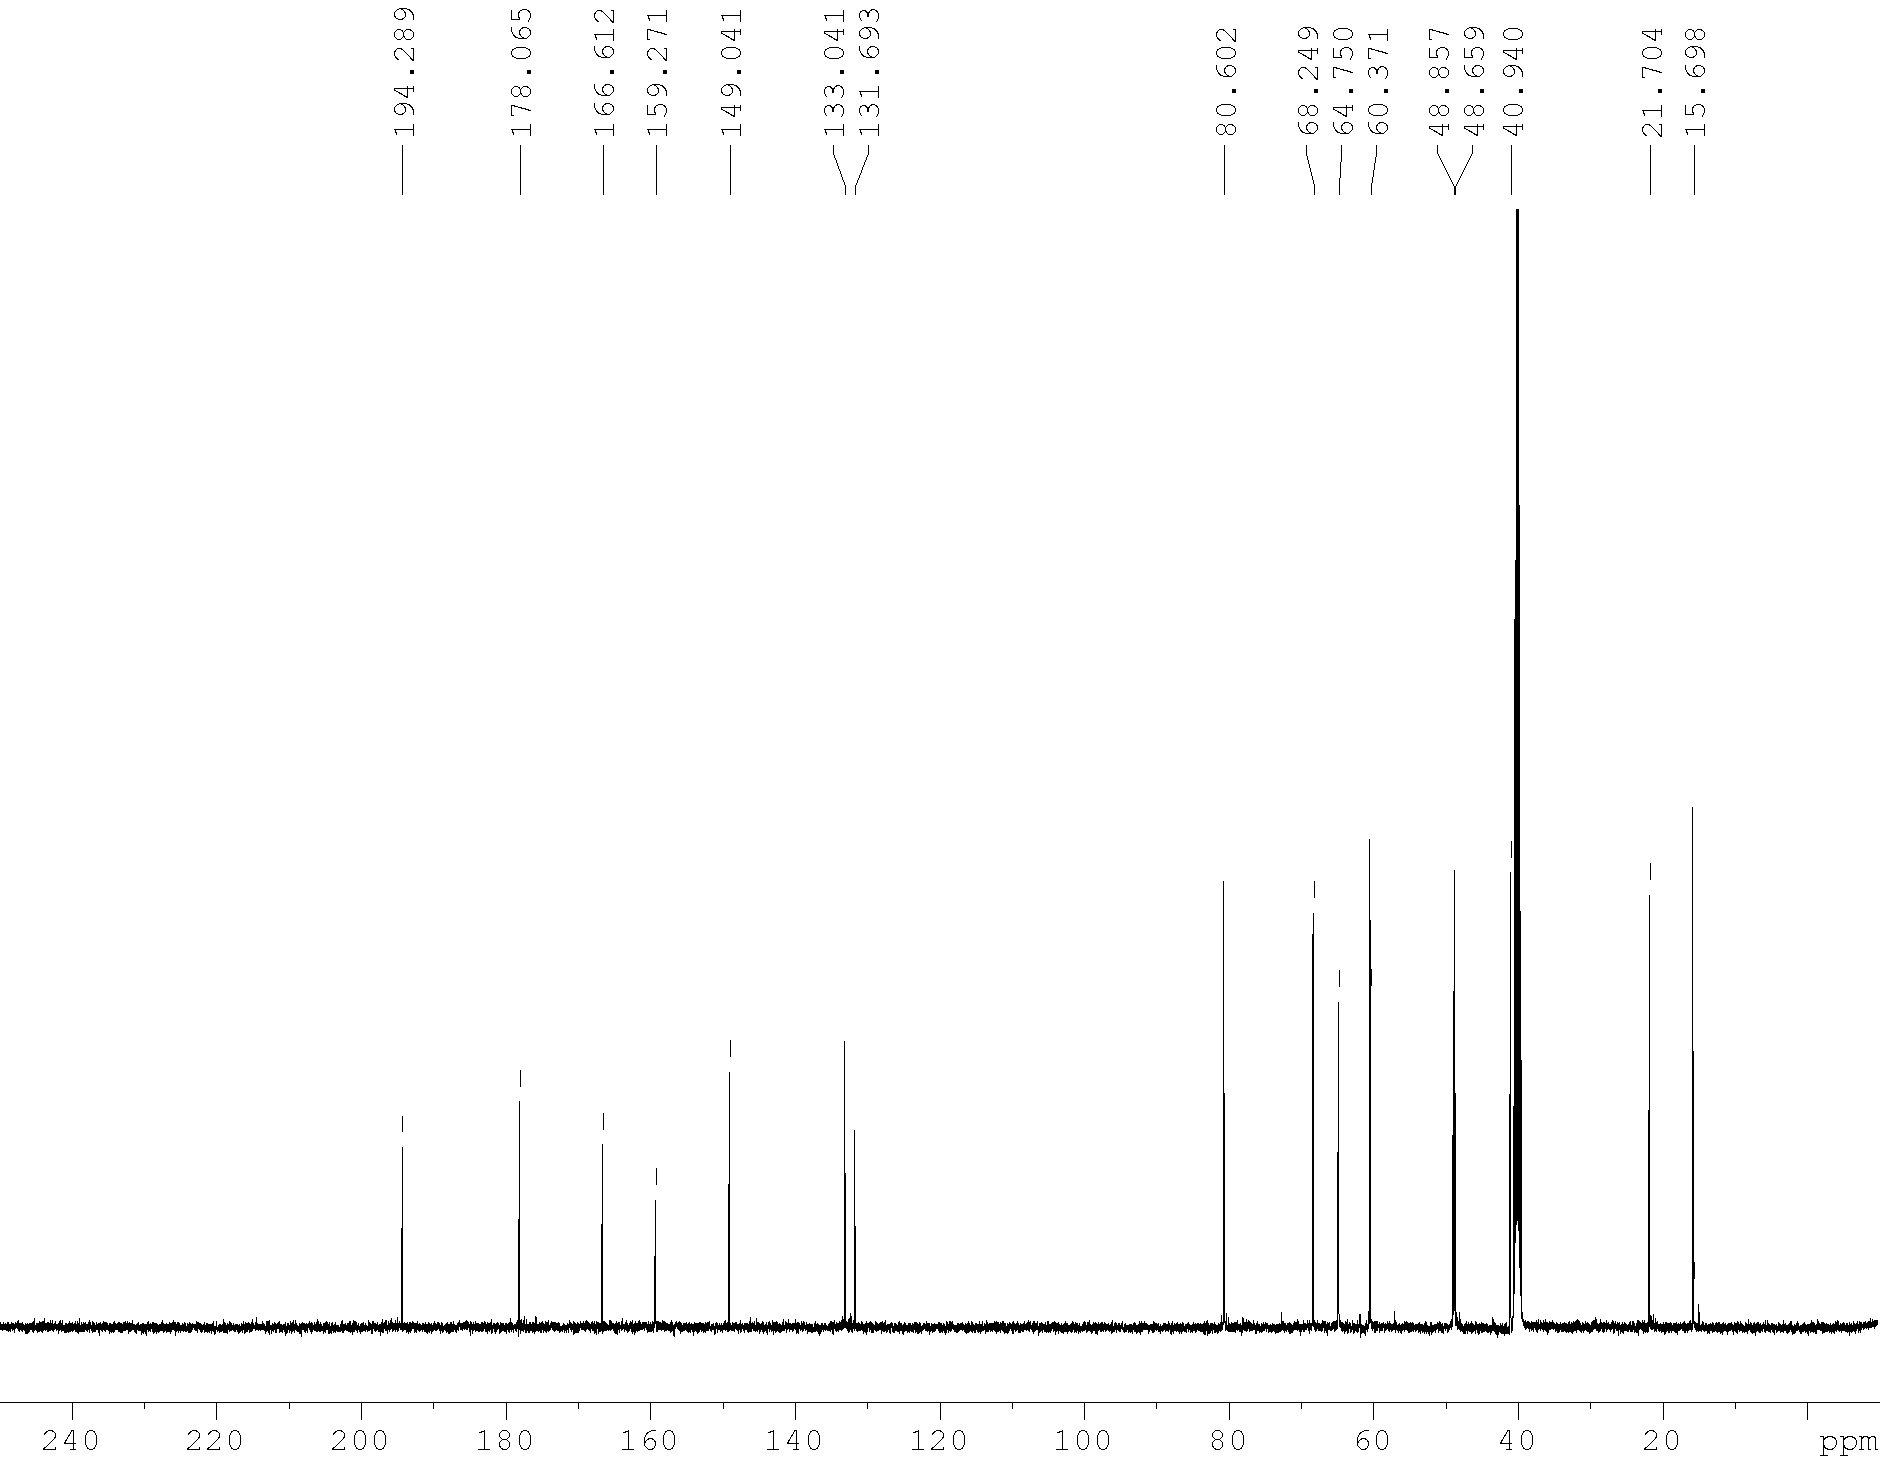


**Lc-oxalate**,1H NMR (300 MHz, DMSO)

**
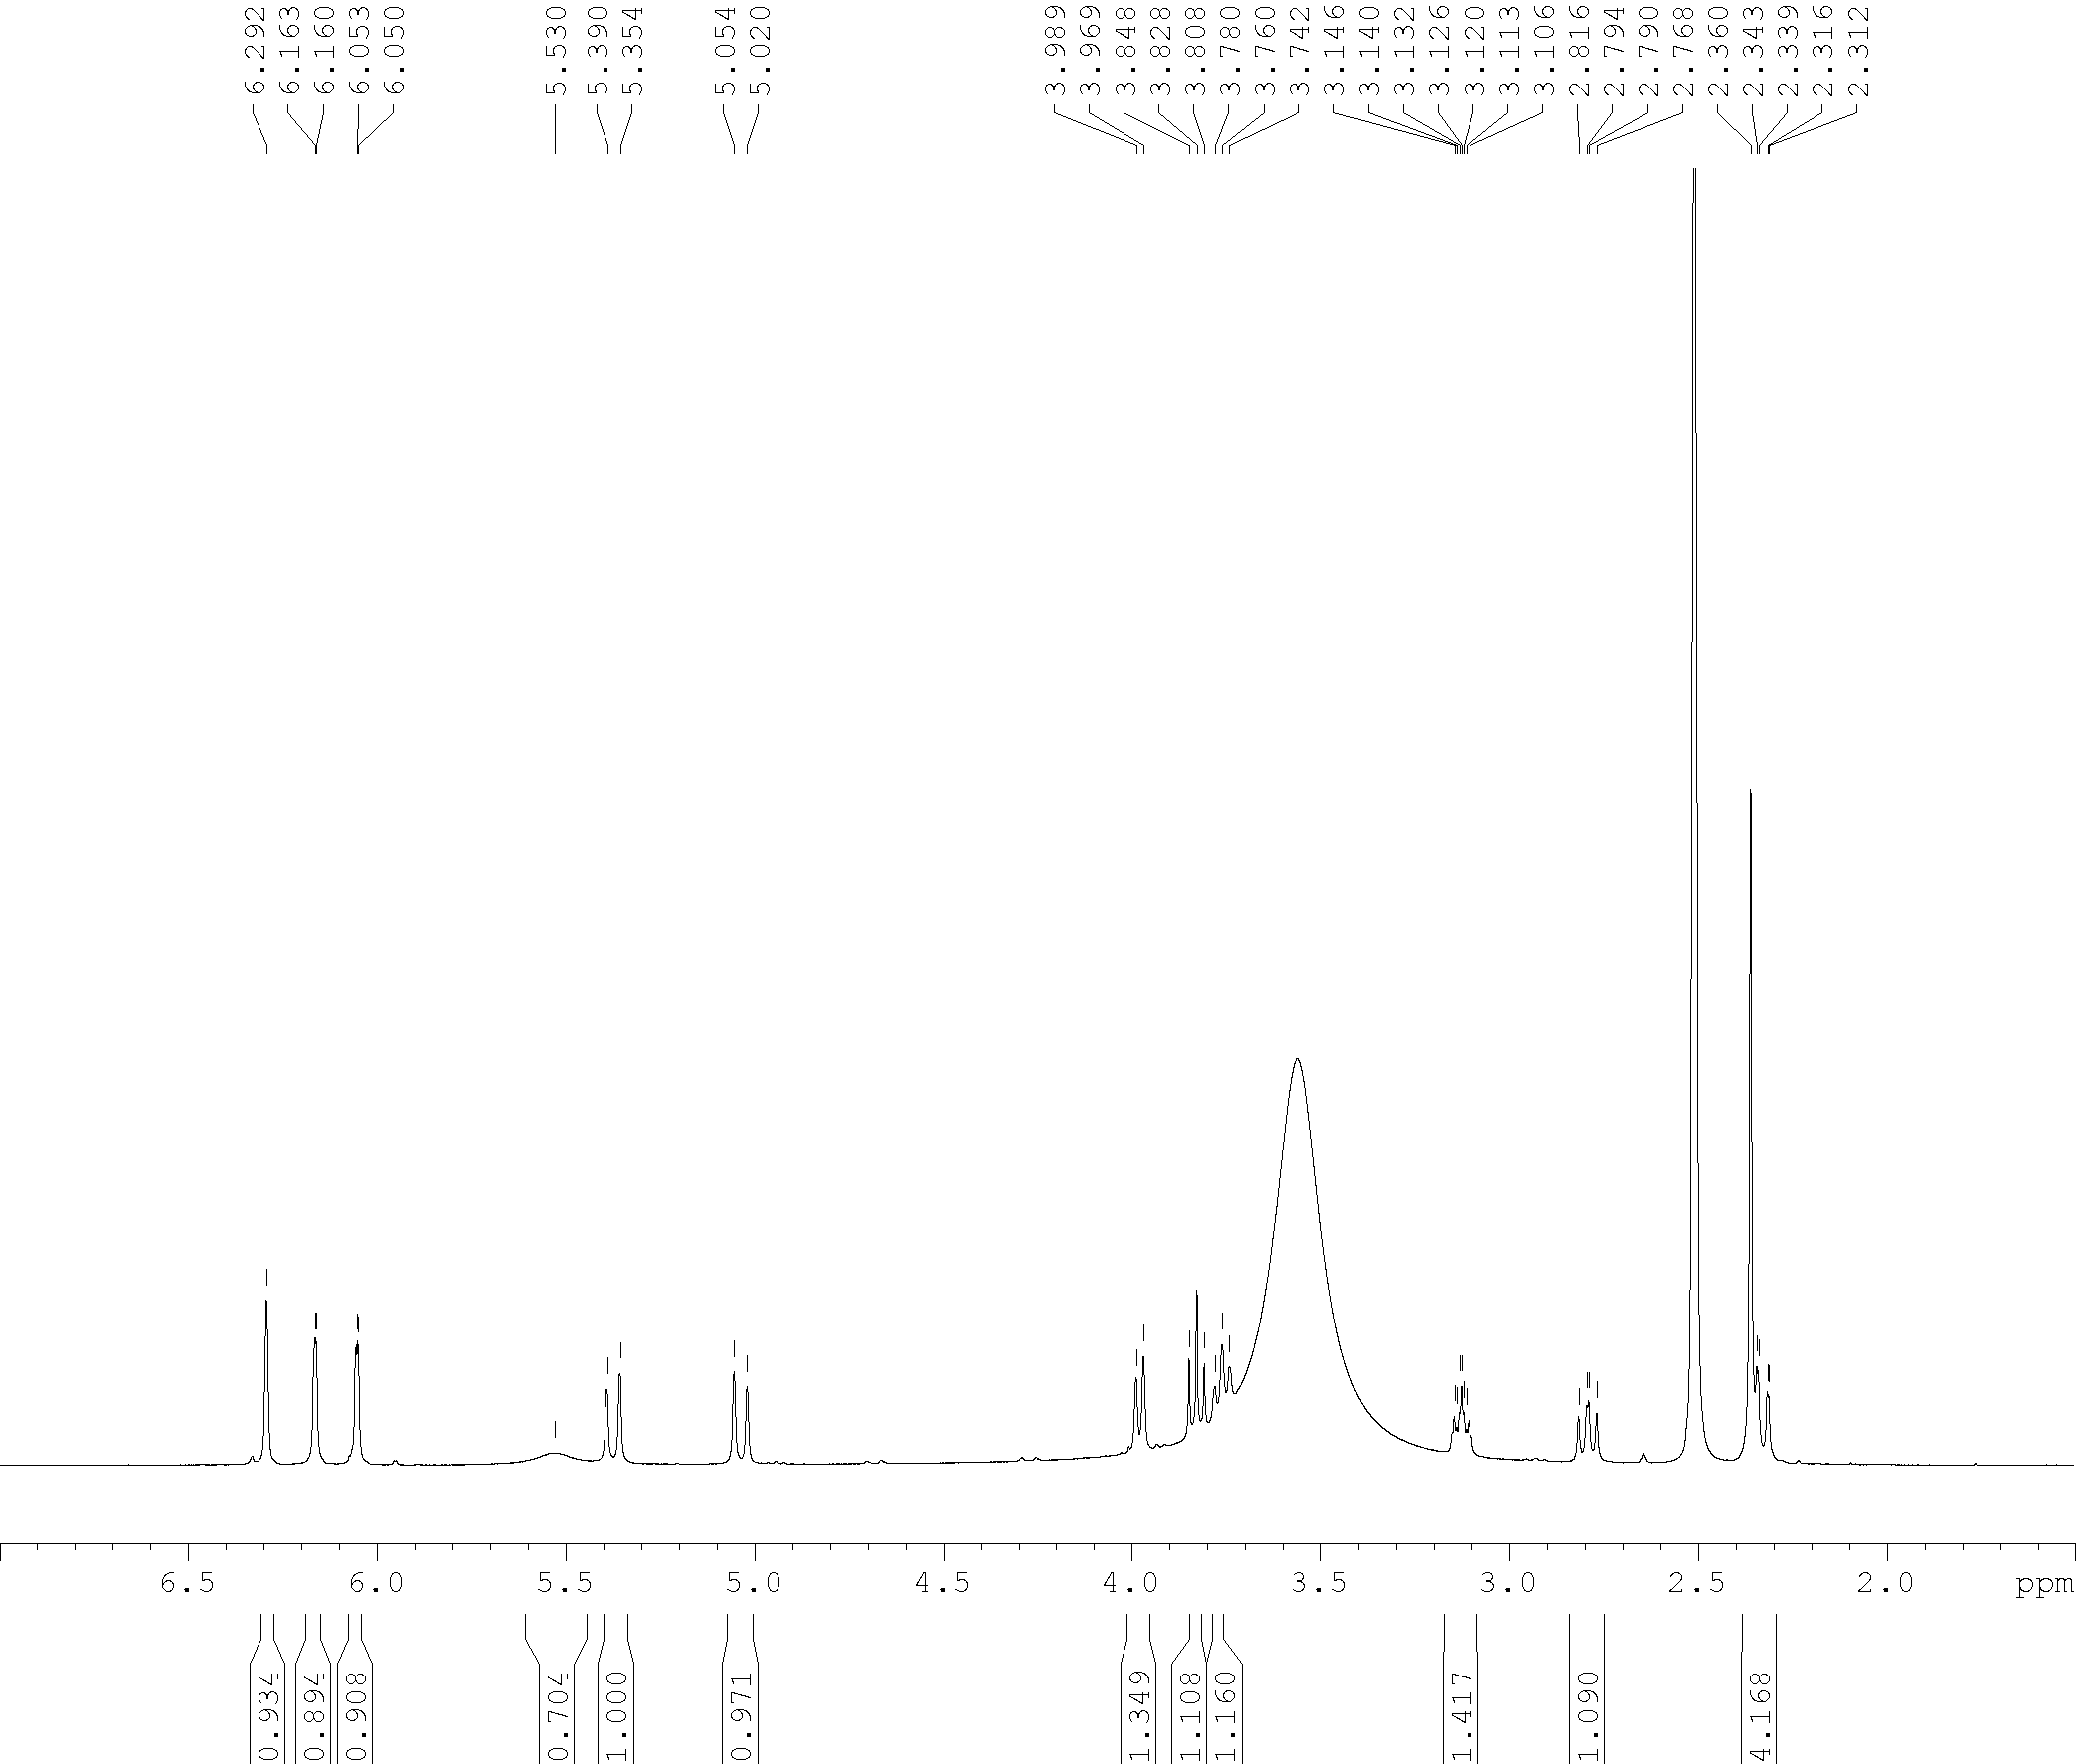
**

**Lc-oxalate**,13C NMR (75 MHz, DMSO)

**
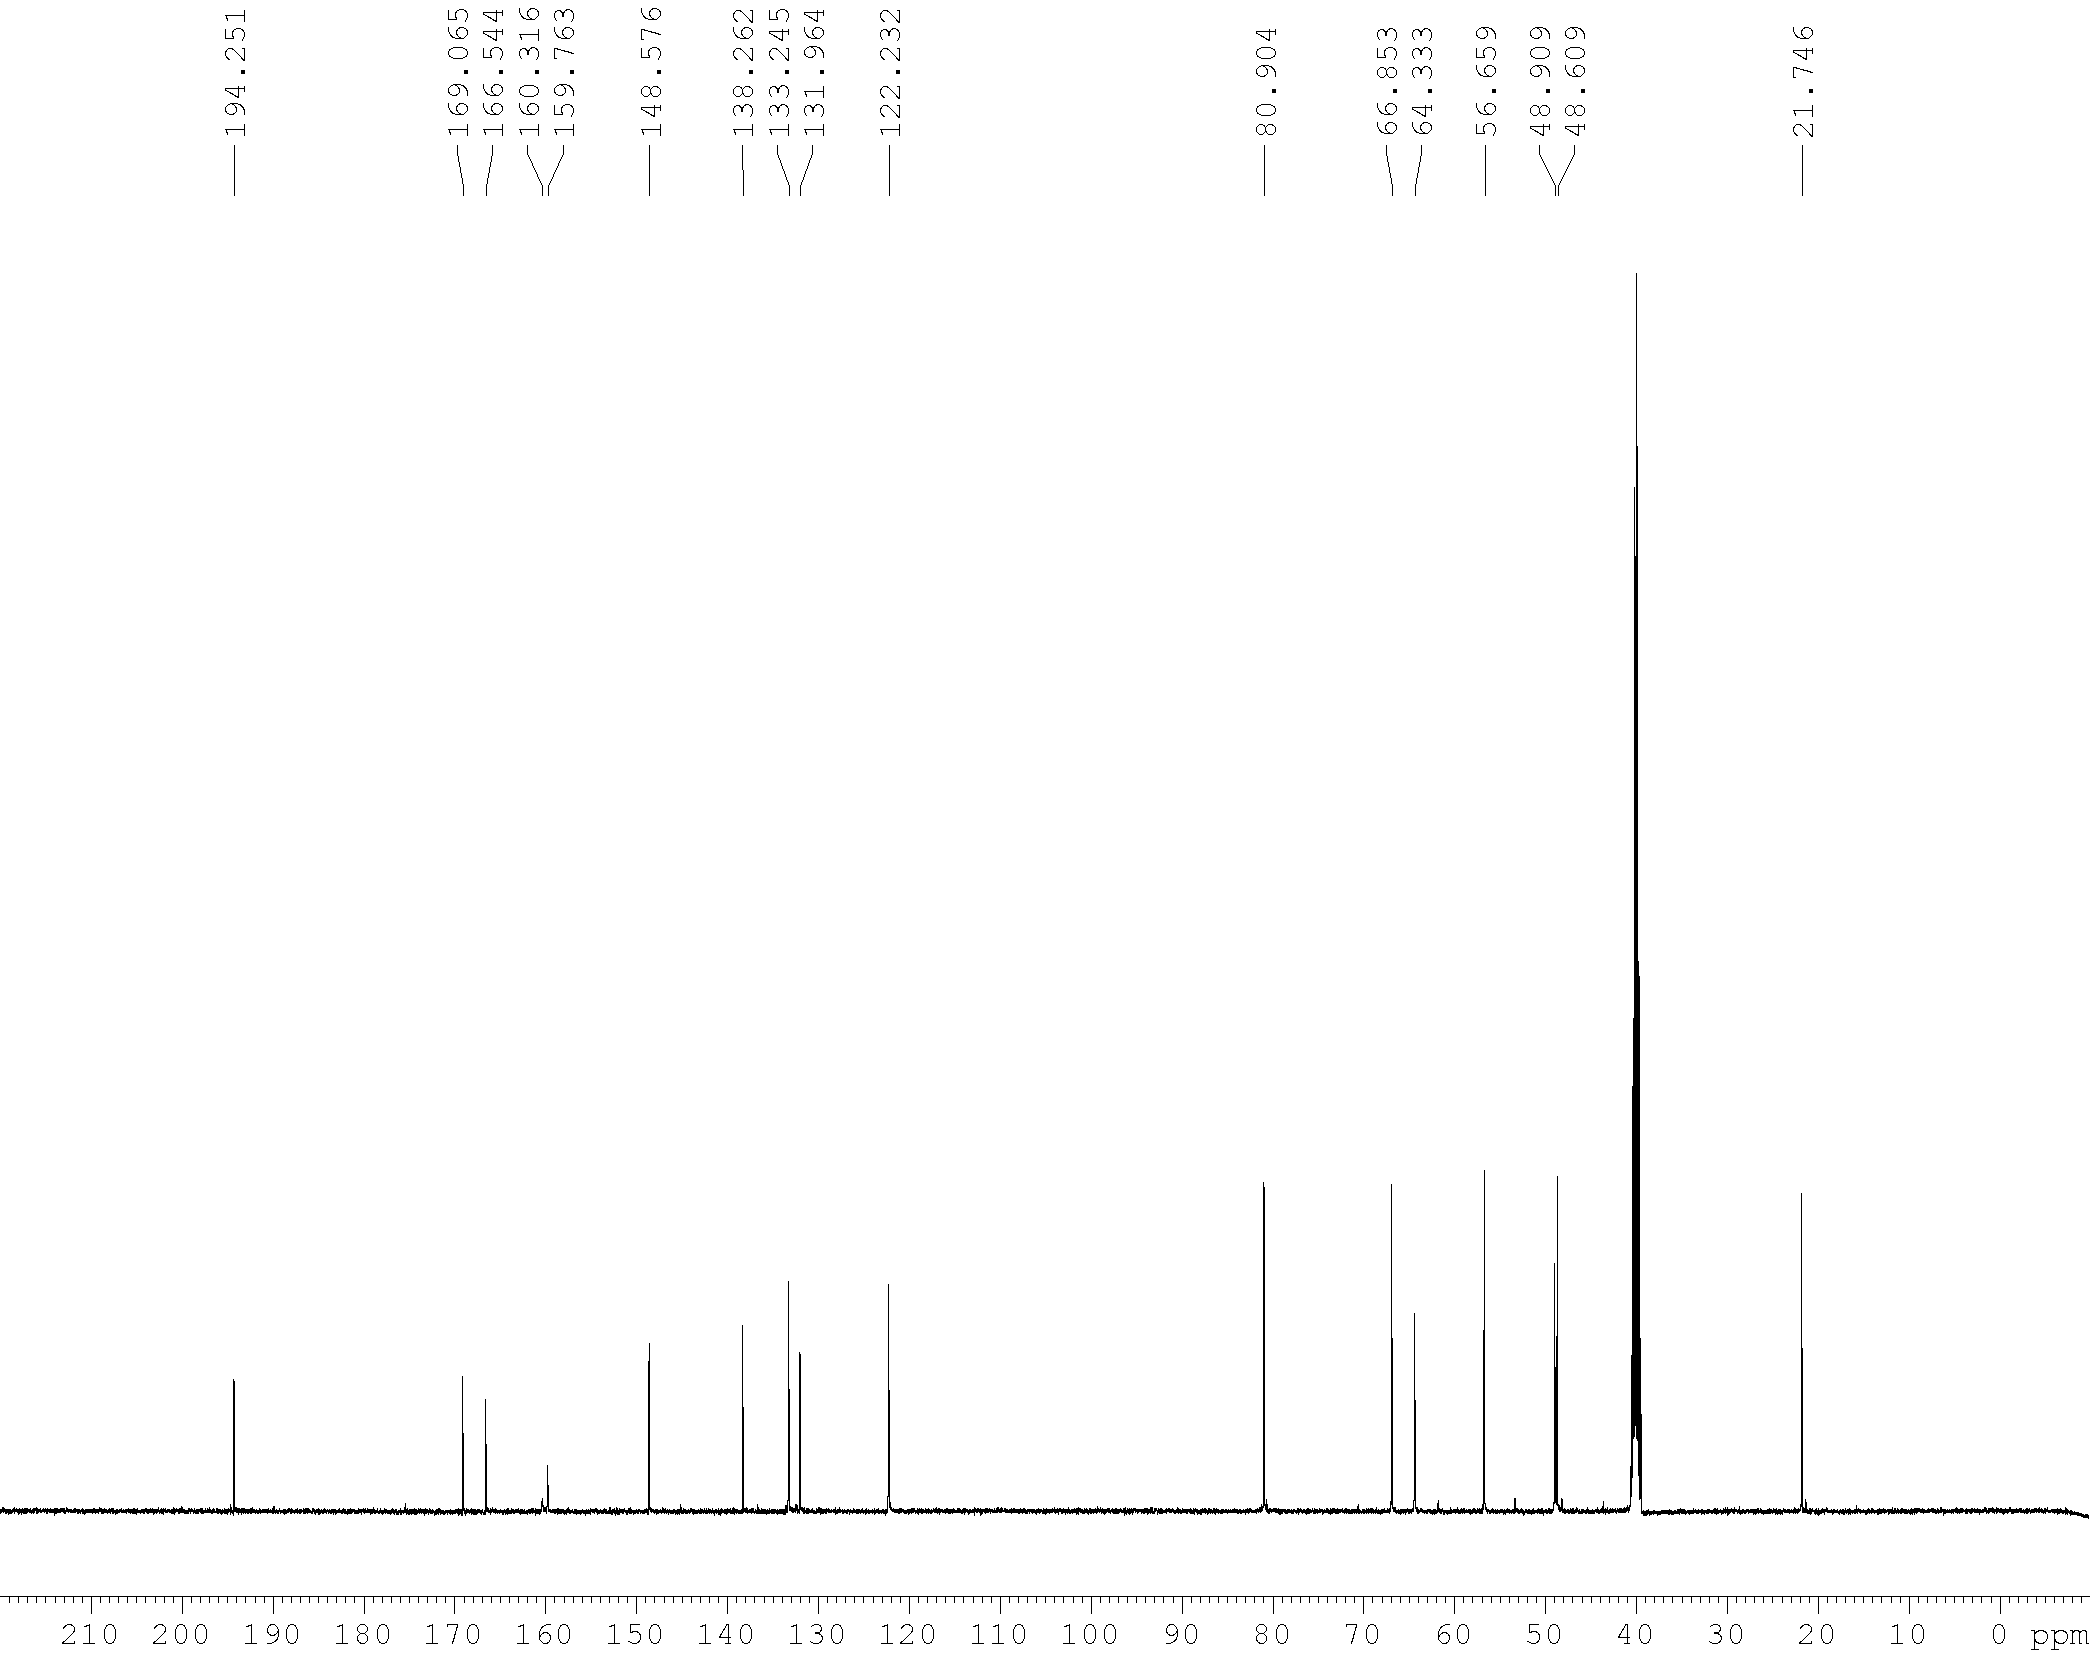
**

**DHLc-glycoside**,1H NMR (300 MHz, DMSO)

**
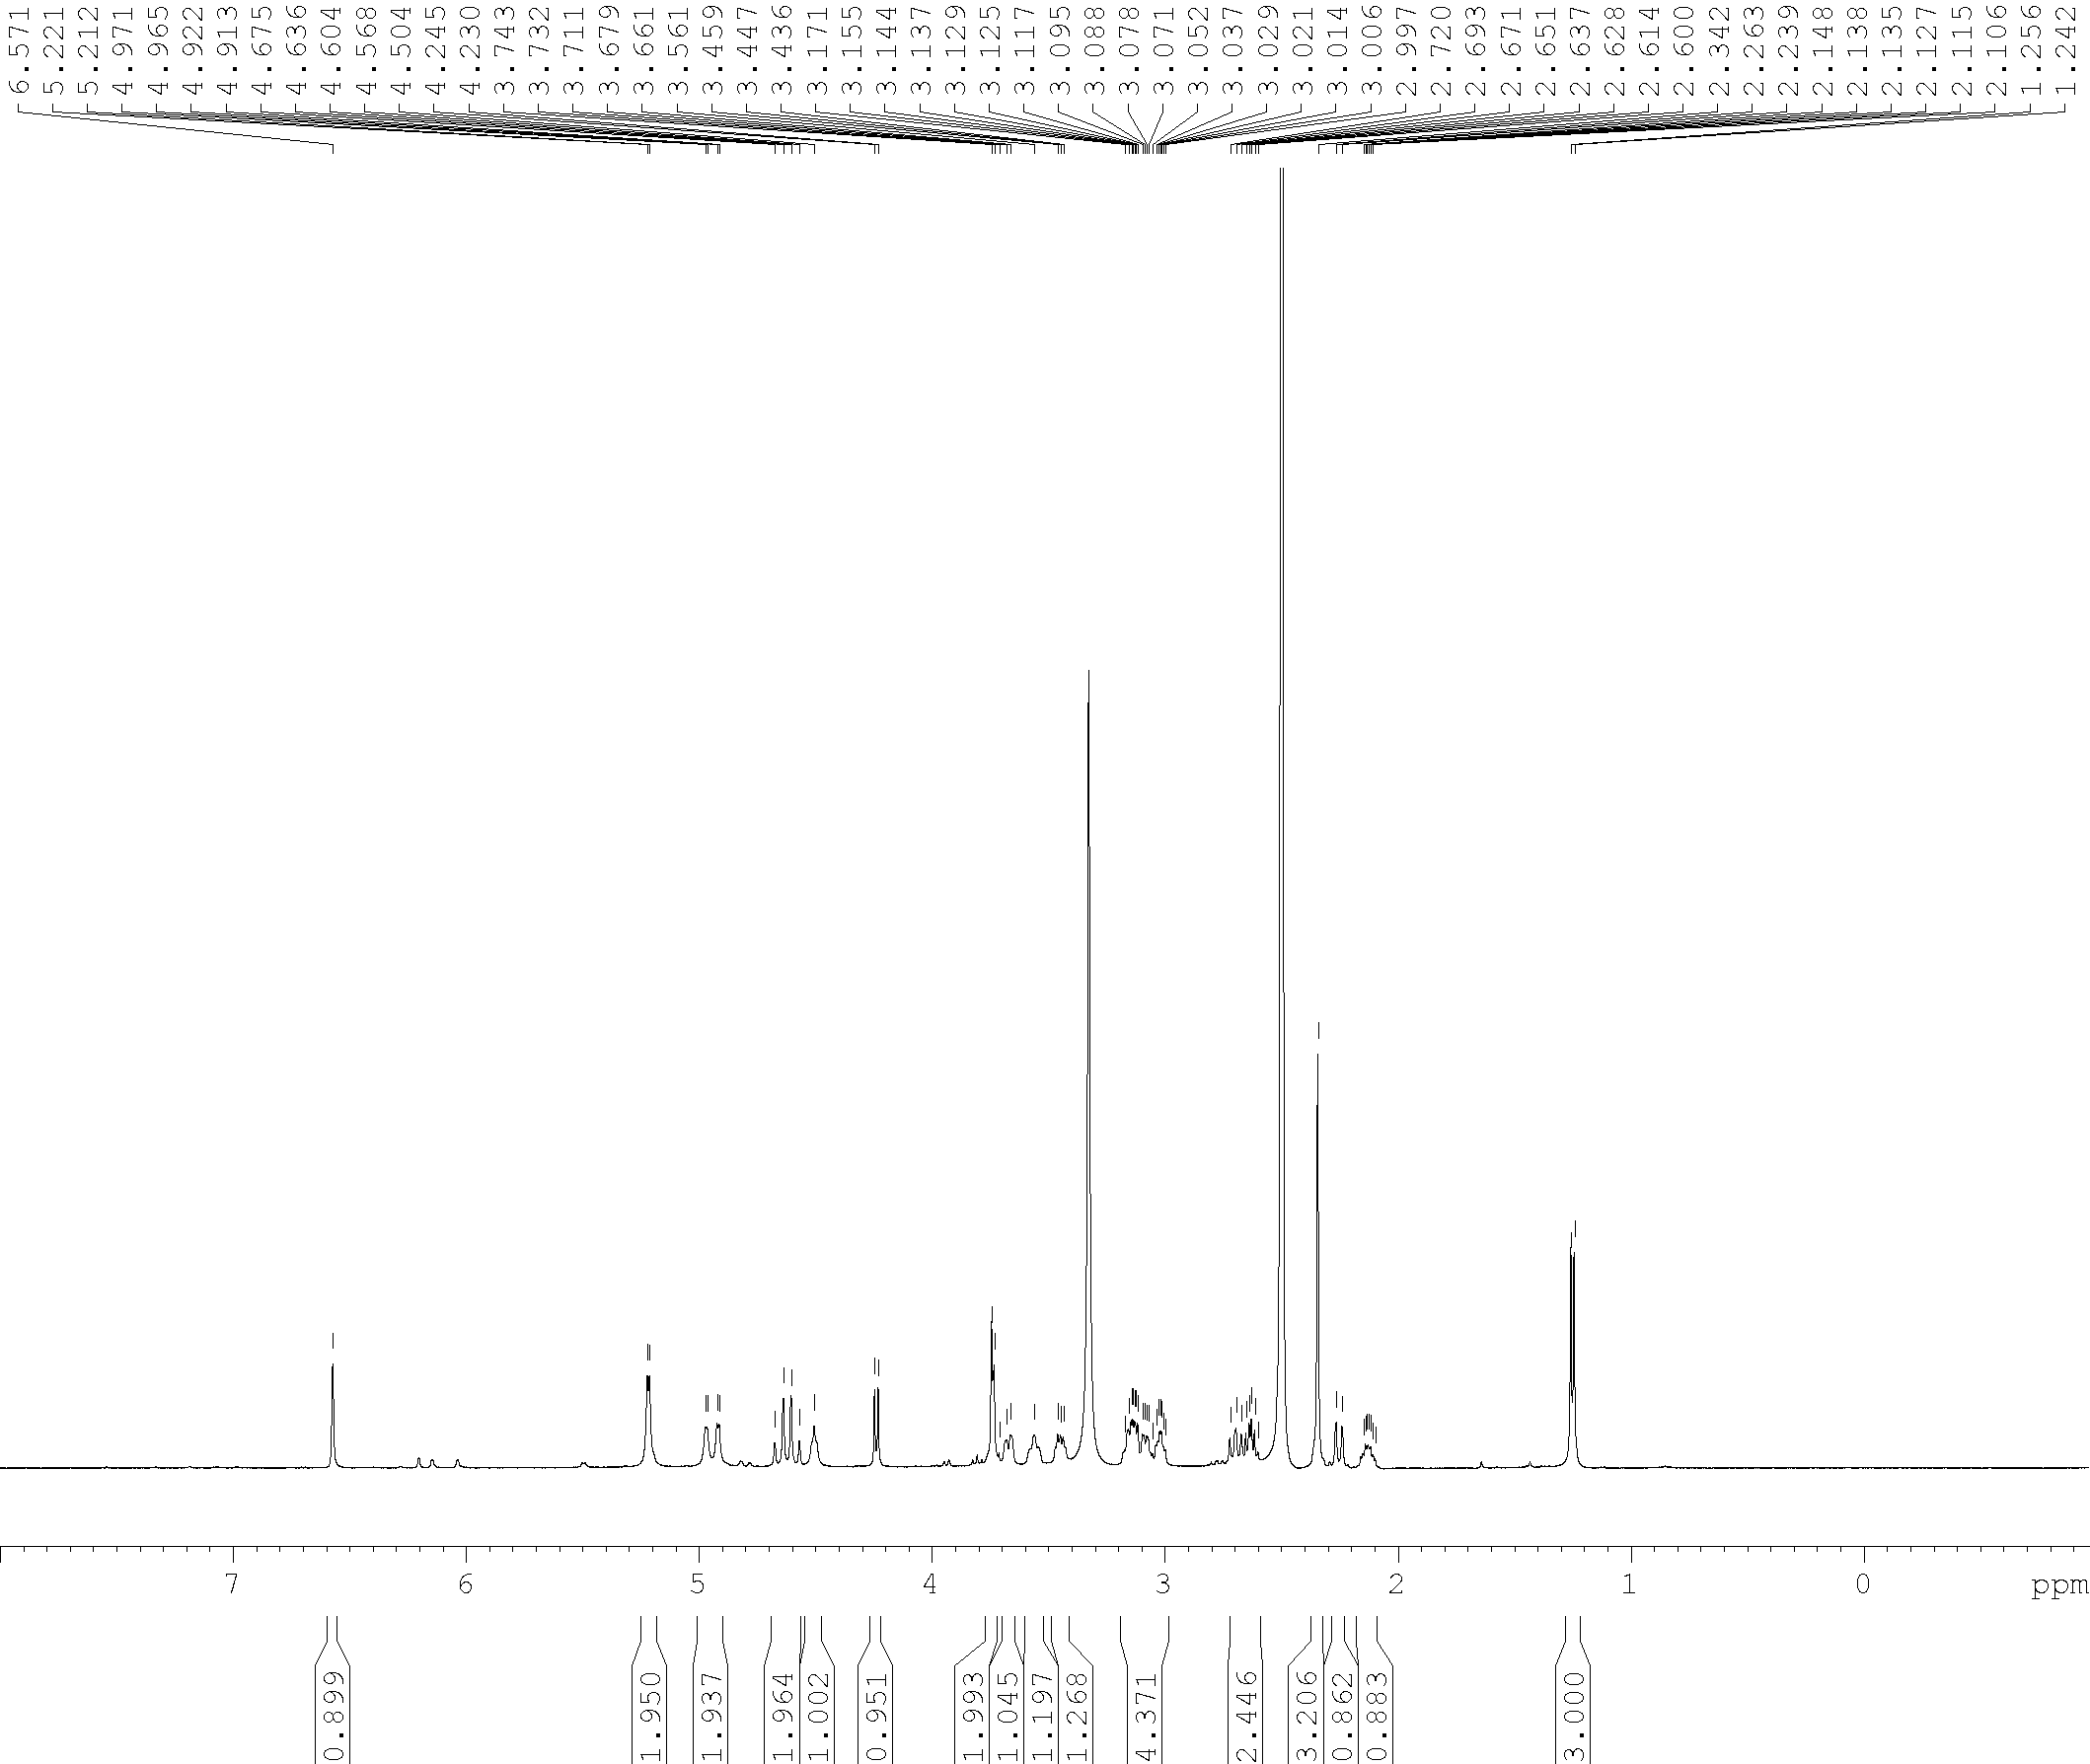
**


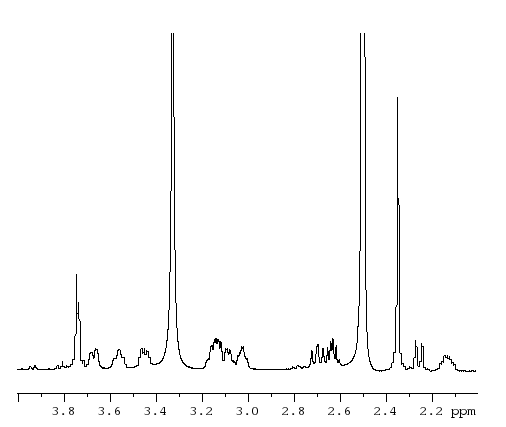


**DHLc-glycoside**, 13C NMR (75 MHz, DMSO)

**
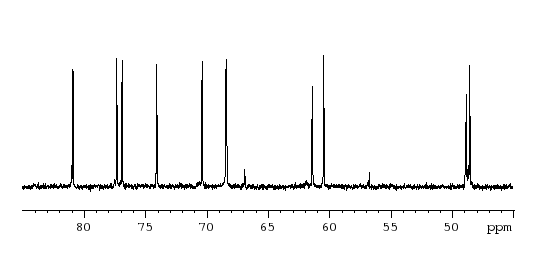

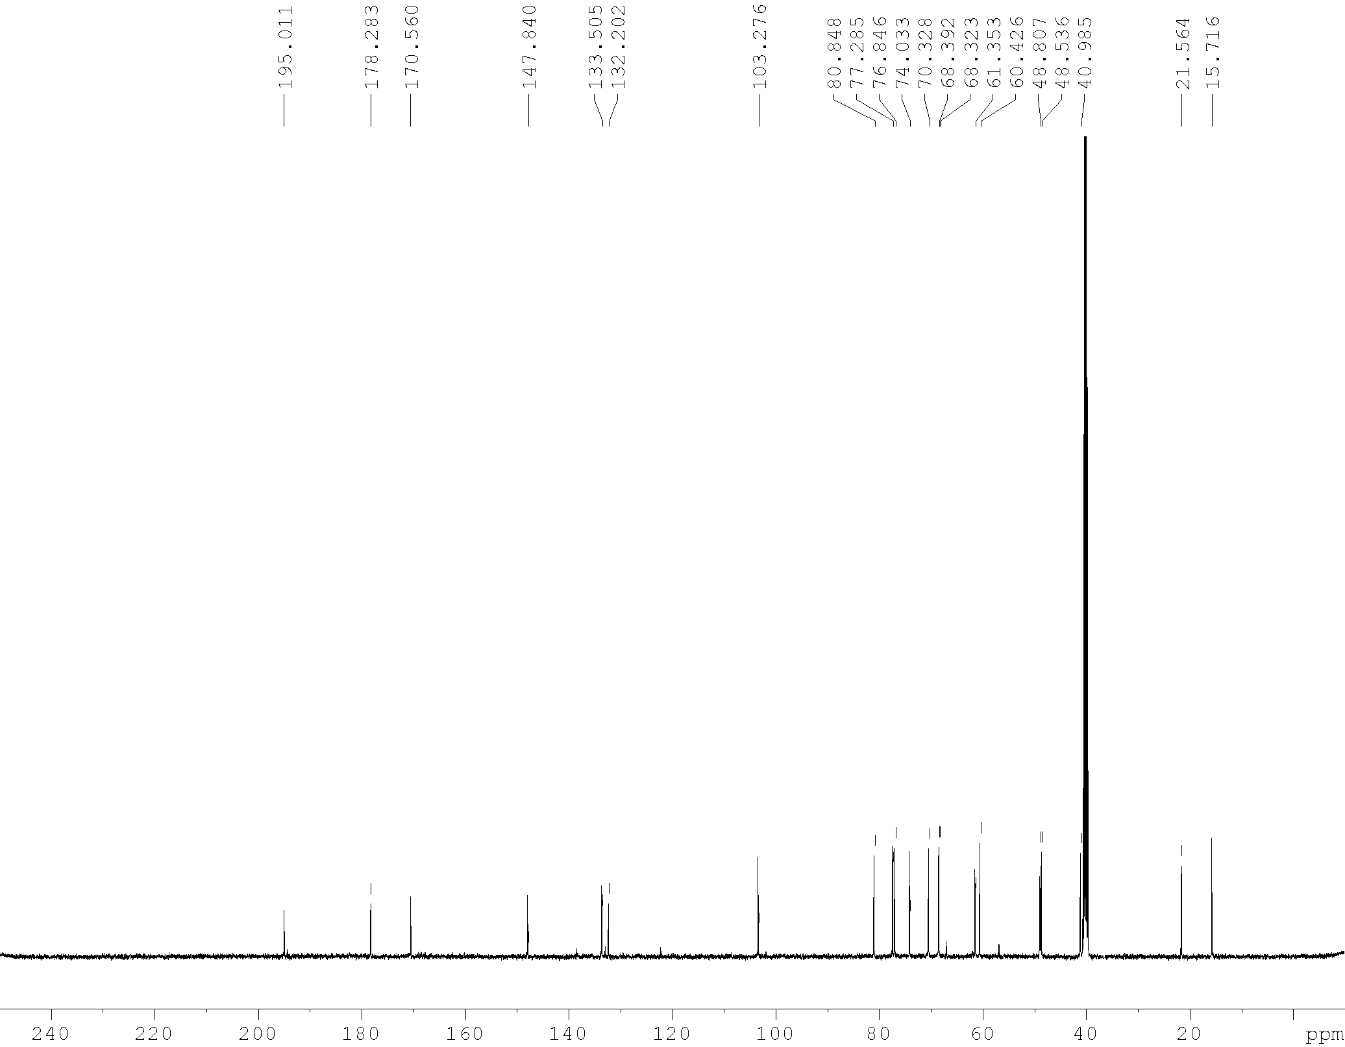
**

**
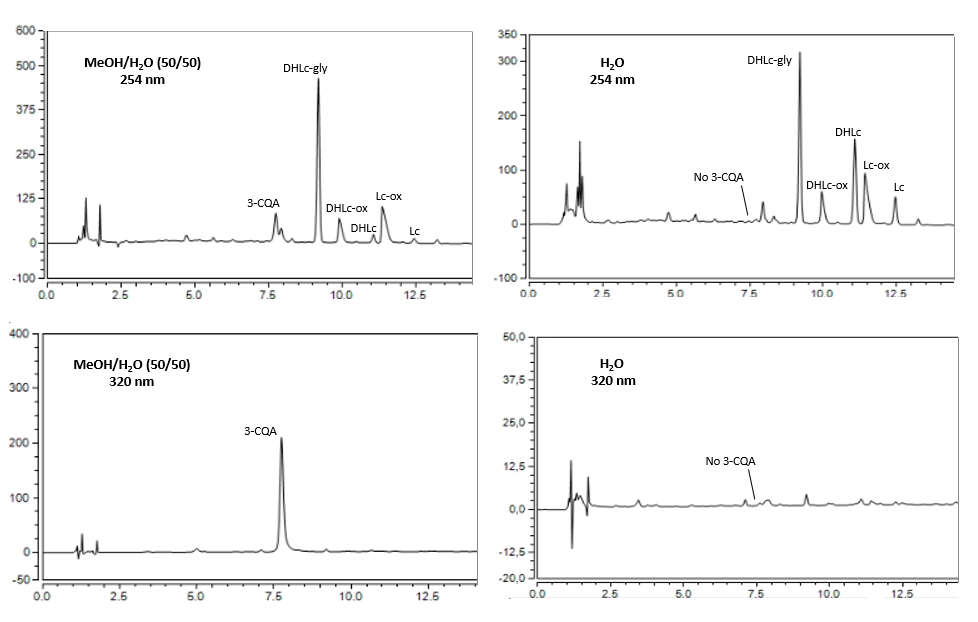
Supplementary Figure S1.** HPLC profiles (254 and 320 nm) of a water/methanol 50/50 and pure water extracts and different content in 3-CQA.

DHLc-gly

DHLc-ox

DHLc

Lc-ox

Lc

**LC-QTOF-HRMS (+) Analysis of STLs**


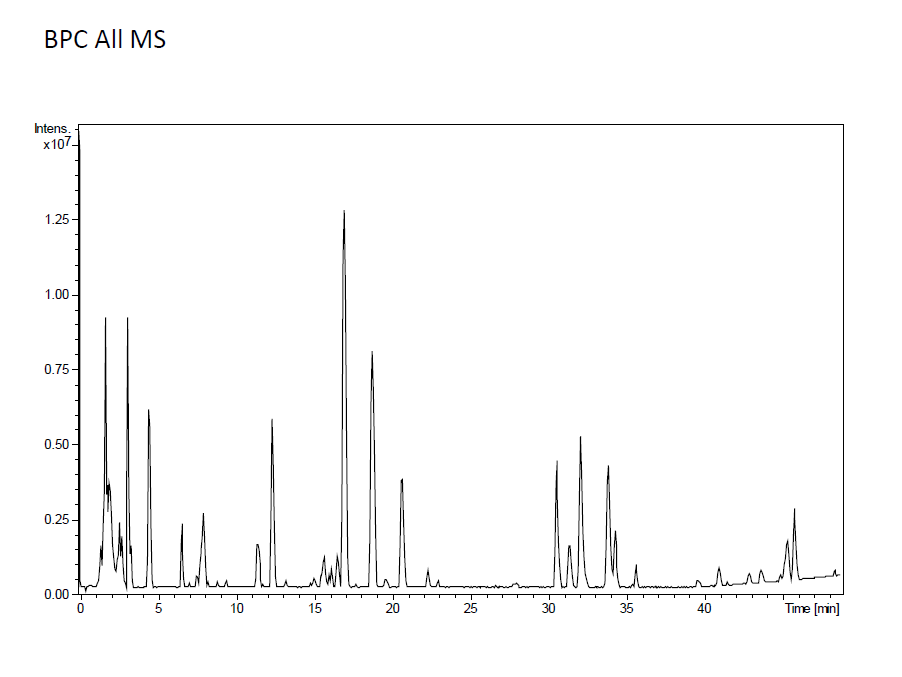


**Supplementary Figure S2.** Base peak chromatogram (BPC, All − MS) of a water chicory extract obtained in the positive mode.


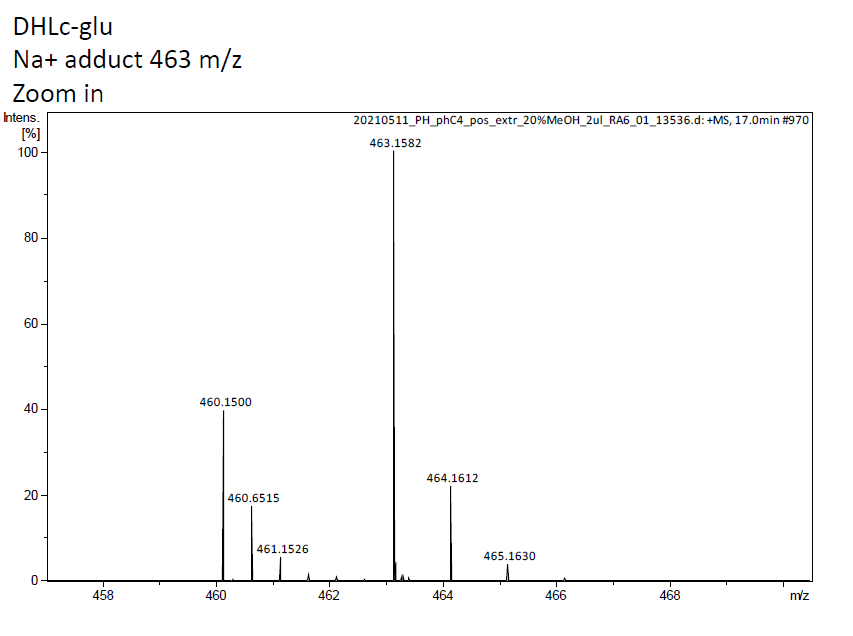

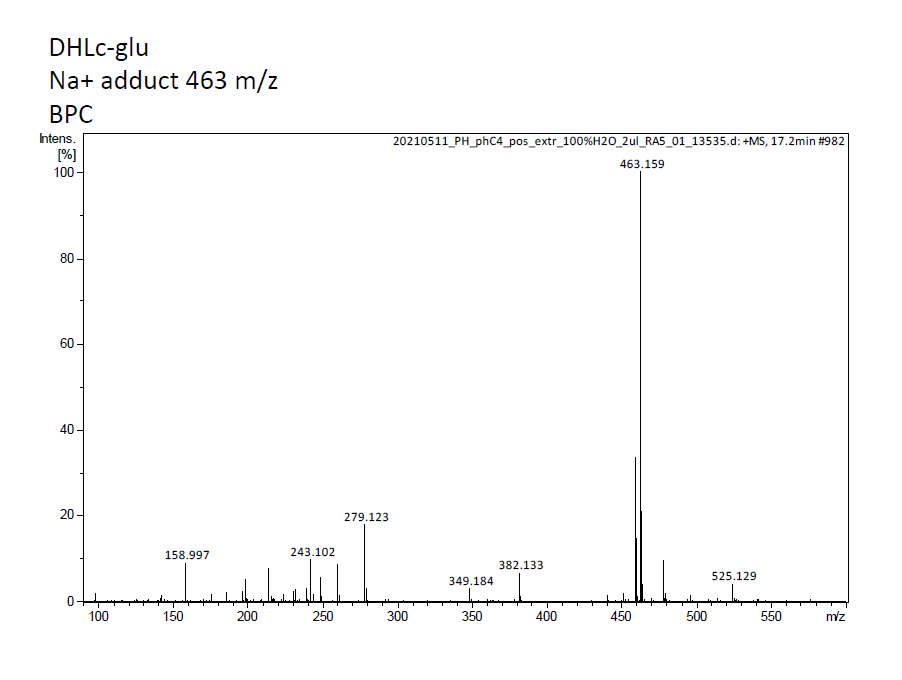
**DHLc-gly**


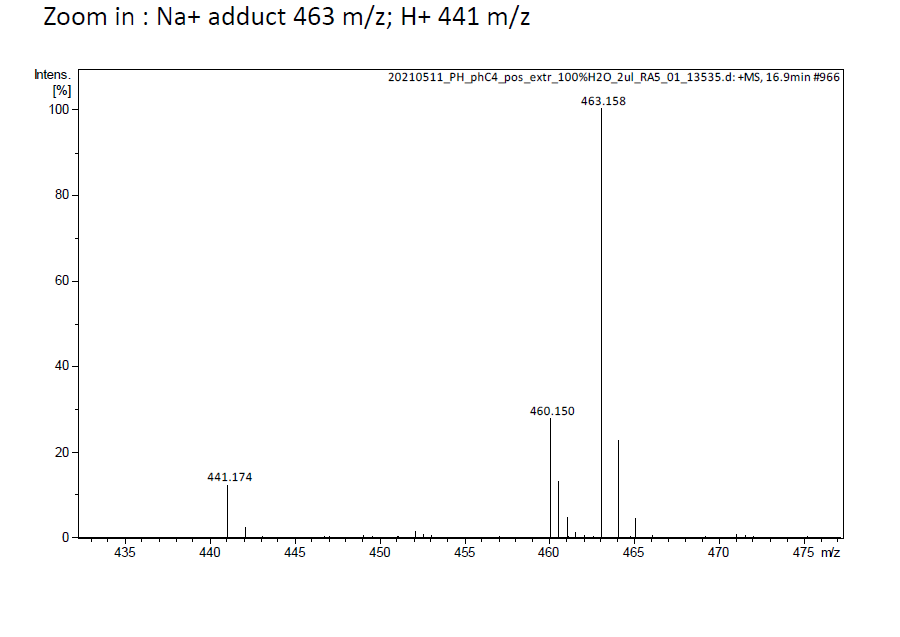


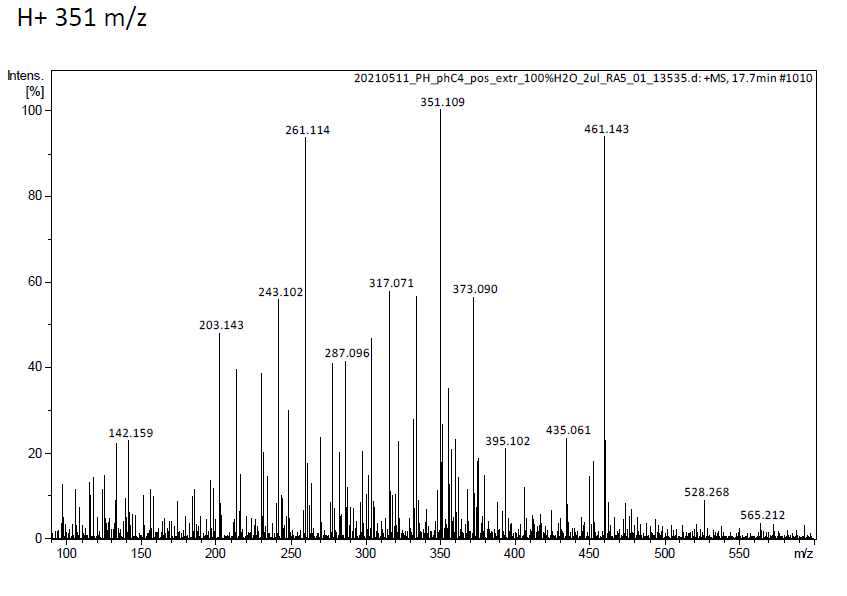
**DHLc-ox**

**
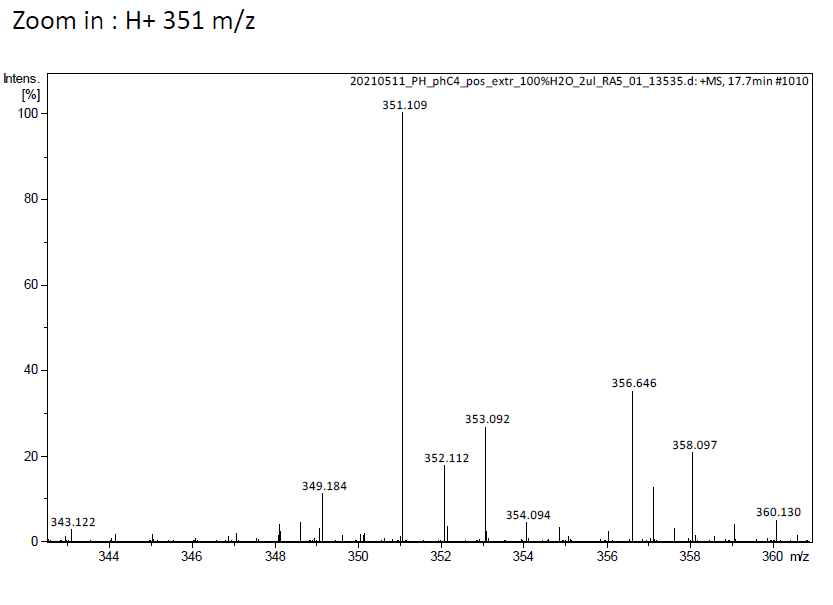
**

**
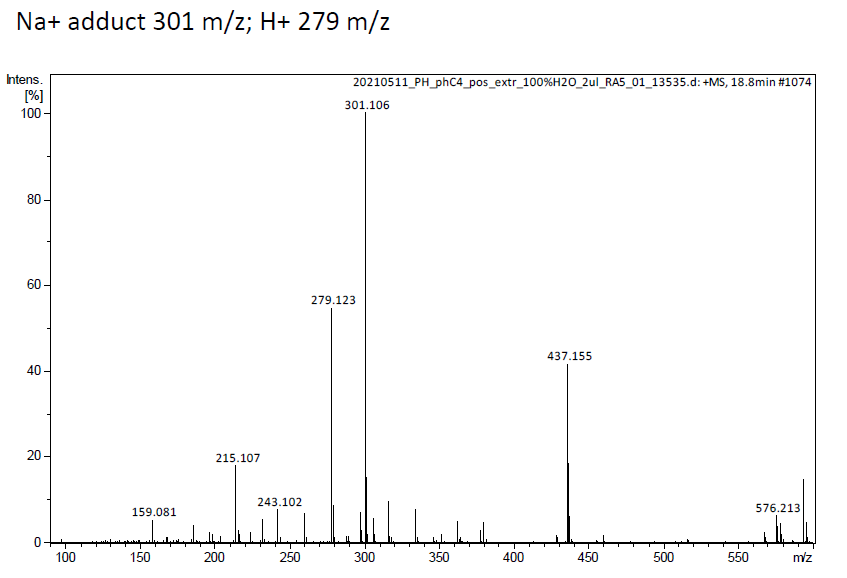
DHLc**

**
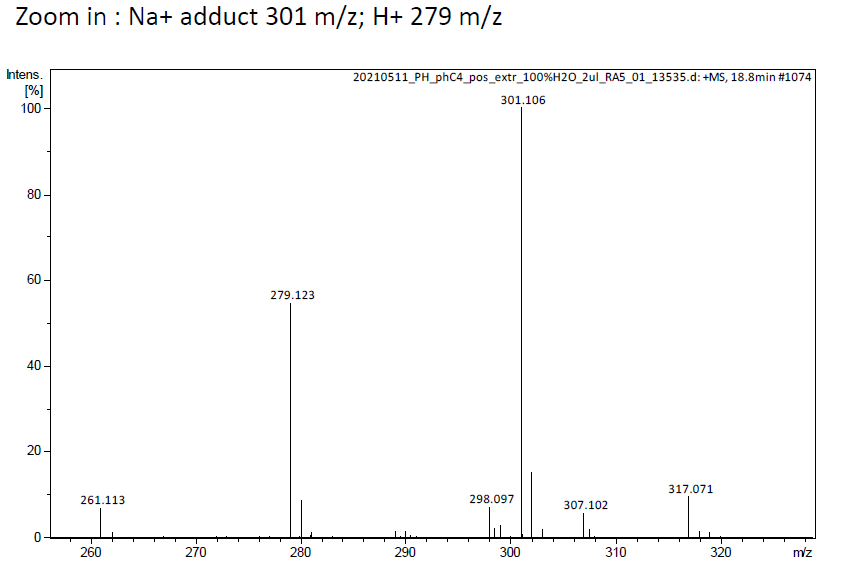
**

**
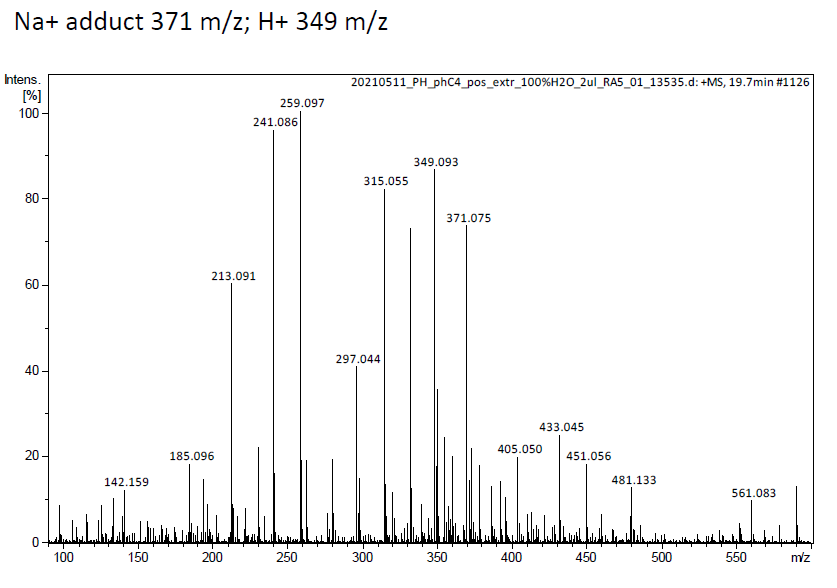
Lc-ox**

**
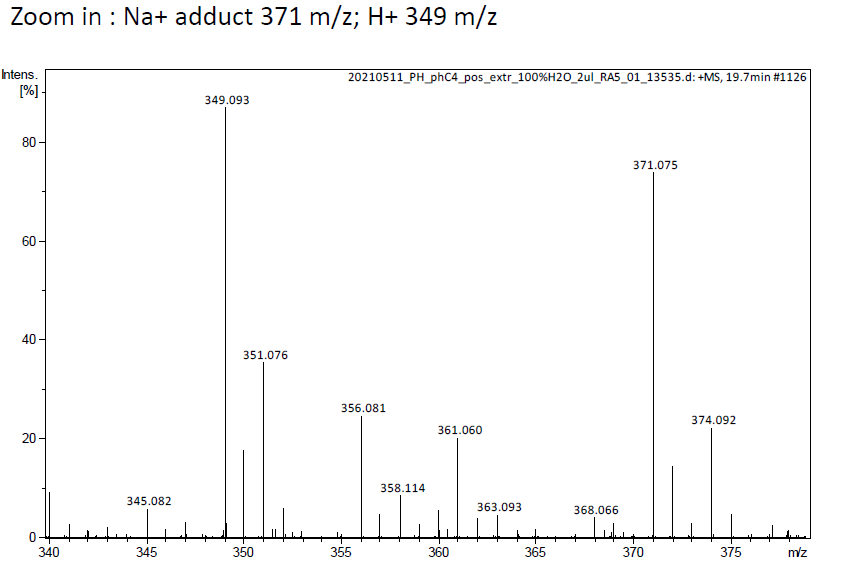
**


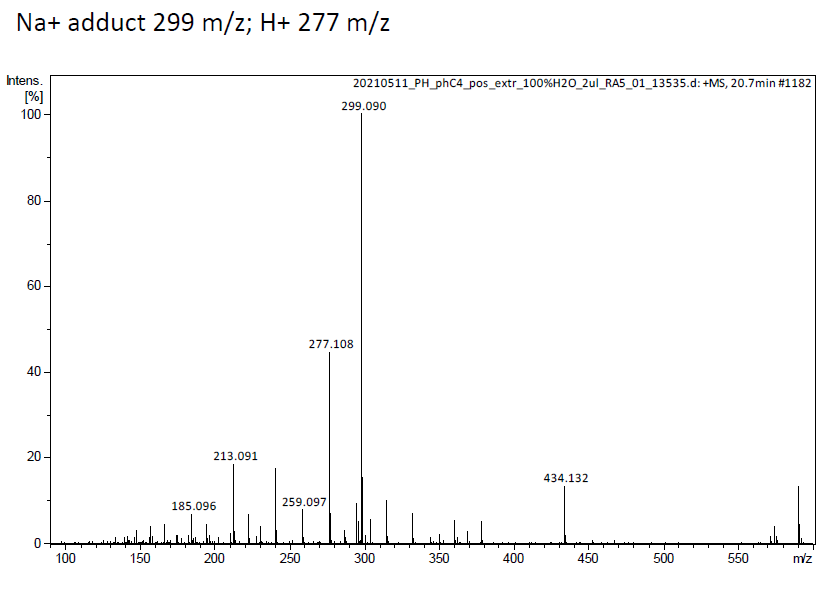
**Lc**


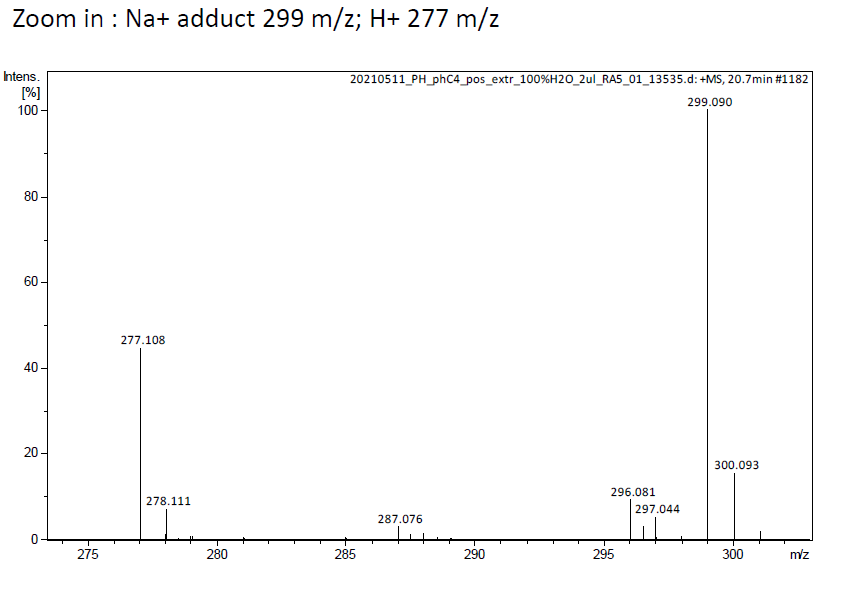

Supplement: Supplementary file 1 [file supplementary]
